1 **Adhesion to nanofibers drives cell membrane remodeling through 1D**  
2 **wetting**

3

4 Arthur Charles-Orszag,<sup>1,2</sup> Feng-Ching Tsai,<sup>3,4</sup> Daria Bonazzi,<sup>1</sup> Valeria Manriquez,<sup>1,2</sup> Martin  
5 Sachse,<sup>5</sup> Adeline Mallet,<sup>5</sup> Audrey Salles,<sup>6</sup> Keira Melican,<sup>1,†</sup> Ralitzza Staneva,<sup>7</sup> Aurélie  
6 Bertin,<sup>3,4</sup> Corinne Millien,<sup>8</sup> Sylvie Goussard,<sup>1</sup> Pierre Lafaye,<sup>9</sup> Spencer Shorte,<sup>6</sup> Matthieu  
7 Piel,<sup>10,11</sup> Jacomine Krijnse-Locker,<sup>5</sup> Françoise Brochard-Wyart,<sup>3,4</sup> Patricia Bassereau<sup>3,4</sup> &  
8 Guillaume Duménil<sup>1,\*</sup>

9

10 **Affiliations**

11 <sup>1</sup> Pathogenesis of Vascular Infections Unit, INSERM, Institut Pasteur, 75015 Paris, France

12 <sup>2</sup> Université Paris Descartes, Sorbonne Paris Cité, 75006 Paris, France

13 <sup>3</sup> Laboratoire Physico Chimie Curie, Institut Curie, PSL Research University, CNRS  
14 UMR168, 75005 Paris, France

15 <sup>4</sup> Sorbonne Université, 75005, Paris, France

16 <sup>5</sup> Ultrapole, Institut Pasteur, 75015 Paris, France

17 <sup>6</sup> Imagopole, Institut Pasteur, 75015 Paris, France

18 <sup>7</sup> Institut Curie, PSL Research University, CNRS, UMR 144, 75005 Paris, France

19 <sup>8</sup> Paris Cardiovascular Research Center, 75015 Paris, France

20 <sup>9</sup> Antibody Engineering, Institut Pasteur, 75015 Paris, France

21 <sup>10</sup> Systems Biology of Cell Polarity and Cell Division, Institut Pierre-Gilles De Gennes, 75005  
22 Paris, France

23 <sup>11</sup> Institut Curie, 75005 Paris, France

24 <sup>†</sup> Current address: Swedish Medical Nanoscience Center, Department of Neuroscience,  
25 Karolinska Institutet, 171 77 Solna, Sweden

26

27 <sup>\*</sup> Correspondence: [guillaume.dumenil@pasteur.fr](mailto:guillaume.dumenil@pasteur.fr)

28 **Abstract**

29 The shape of cellular membranes is highly regulated by a set of conserved mechanisms. These  
30 mechanisms can be manipulated by bacterial pathogens to infect cells. Human endothelial cell  
31 plasma membrane remodeling by the bacterium *Neisseria meningitidis* is thought to be  
32 essential during the blood phase of meningococcal infection, but the underlying mechanisms  
33 are unknown. Here we show that plasma membrane remodeling occurs independently of F-  
34 actin, along meningococcal type IV pili fibers, by a novel physical mechanism we term "one-  
35 dimensional" membrane wetting. We provide a theoretical model that gives the physical basis  
36 of 1D wetting and show that this mechanism occurs in model membranes interacting with  
37 model nanofibers, and in human cells interacting with model extracellular matrices. It is thus  
38 a new general principle driving the interaction of cells with their environment at the nanoscale  
39 that is diverted by meningococcus during infection.

40 **Main text**

41 Control of the shape of biological membranes is fundamental for the maintenance of  
42 multiple functions in the eukaryotic cell<sup>1</sup>. Acting as the interface of the cell with its  
43 surrounding environment, the plasma membrane is a particularly important compartment that  
44 is subject to a precise control of its shape and dynamics. Plasma membrane remodeling occurs  
45 at very small scales, for example in the biogenesis of caveolae<sup>2</sup> or during the formation of  
46 clathrin coated pits<sup>3</sup>. At larger scales, remodeling of the plasma membrane plays an important  
47 role in a wide variety of biological processes, such as the uptake of large particles by  
48 phagocytosis<sup>4</sup> or in the formation of actin-based membrane structures that support cell  
49 migration and probing of the extracellular environment, such as filopodia or lamellipodia<sup>5</sup>. In  
50 the context of pathological conditions, especially in bacterial, viral and fungal infections,  
51 pathogens manipulate the shape of the plasma membrane to enter host cells. This is often  
52 achieved by diverting the actin cytoskeleton<sup>6,8</sup>. Other pathogens remain extracellular and must  
53 then resist mechanical strains such as those generated by flow<sup>9</sup>. The bacterium *Neisseria*  
54 *meningitidis* (or meningococcus) is a human pathogen that, while remaining extracellular<sup>10</sup>,  
55 massively remodels the host cell plasma membrane to form filopodia-like protrusions that  
56 intercalate between aggregated bacteria upon adhesion to the host cell surface. It was shown  
57 *in vitro* that plasma membrane remodeling allows *N. meningitidis* to proliferate on the outside  
58 of the host cell while mechanically resisting high shear stress levels<sup>11</sup>, suggesting a central role  
59 for plasma membrane remodeling in the blood phase of *N. meningitidis* pathogenesis where  
60 bacteria are subject to high shear. Colonization of the blood vessels by *N. meningitidis*  
61 eventually leads to a loss of vascular function that translates into hemorrhagic lesions in  
62 organs throughout the body, including the skin where it presents as characteristic purpuric  
63 rashes<sup>12-14</sup>. Despite the intensive use of antibiotics, the case fatality rate for meningococcal

64 sepsis can still reach 52%<sup>15</sup>. Understanding this process is thus important in the study of both  
65 infectious processes and mechanisms of plasma membrane dynamics.

66 The molecular mechanisms by which *N. meningitidis* remodels the host cell plasma  
67 membrane are still elusive. While membrane protrusions are enriched in F-actin<sup>16</sup>, our  
68 previous work has shown that inhibition of actin polymerization<sup>11,16,17</sup> or depletion of host cell  
69 ATP<sup>17</sup> have no effect on the remodeling of the host cell plasma membrane. Bacterial type IV  
70 pili (T4P), which are long retractile fibers with a diameter of 6 nm, are required for plasma  
71 membrane remodeling in addition to their role in specific adhesion to human cells<sup>12,18</sup>. Indeed,  
72 adhesion of non-piliated bacteria mediated by non-fibrillar adhesins, like Opa, does not lead  
73 to the formation of plasma membrane protrusions<sup>19</sup>. Furthermore, plasma membrane  
74 remodeling is tightly linked to the amount of T4P expressed by the bacteria, as a 30%  
75 decrease in T4P is sufficient to strongly decrease cell surface remodeling<sup>20</sup>. However, the  
76 molecular mode of action of T4P in plasma membrane remodeling is currently unknown.

77



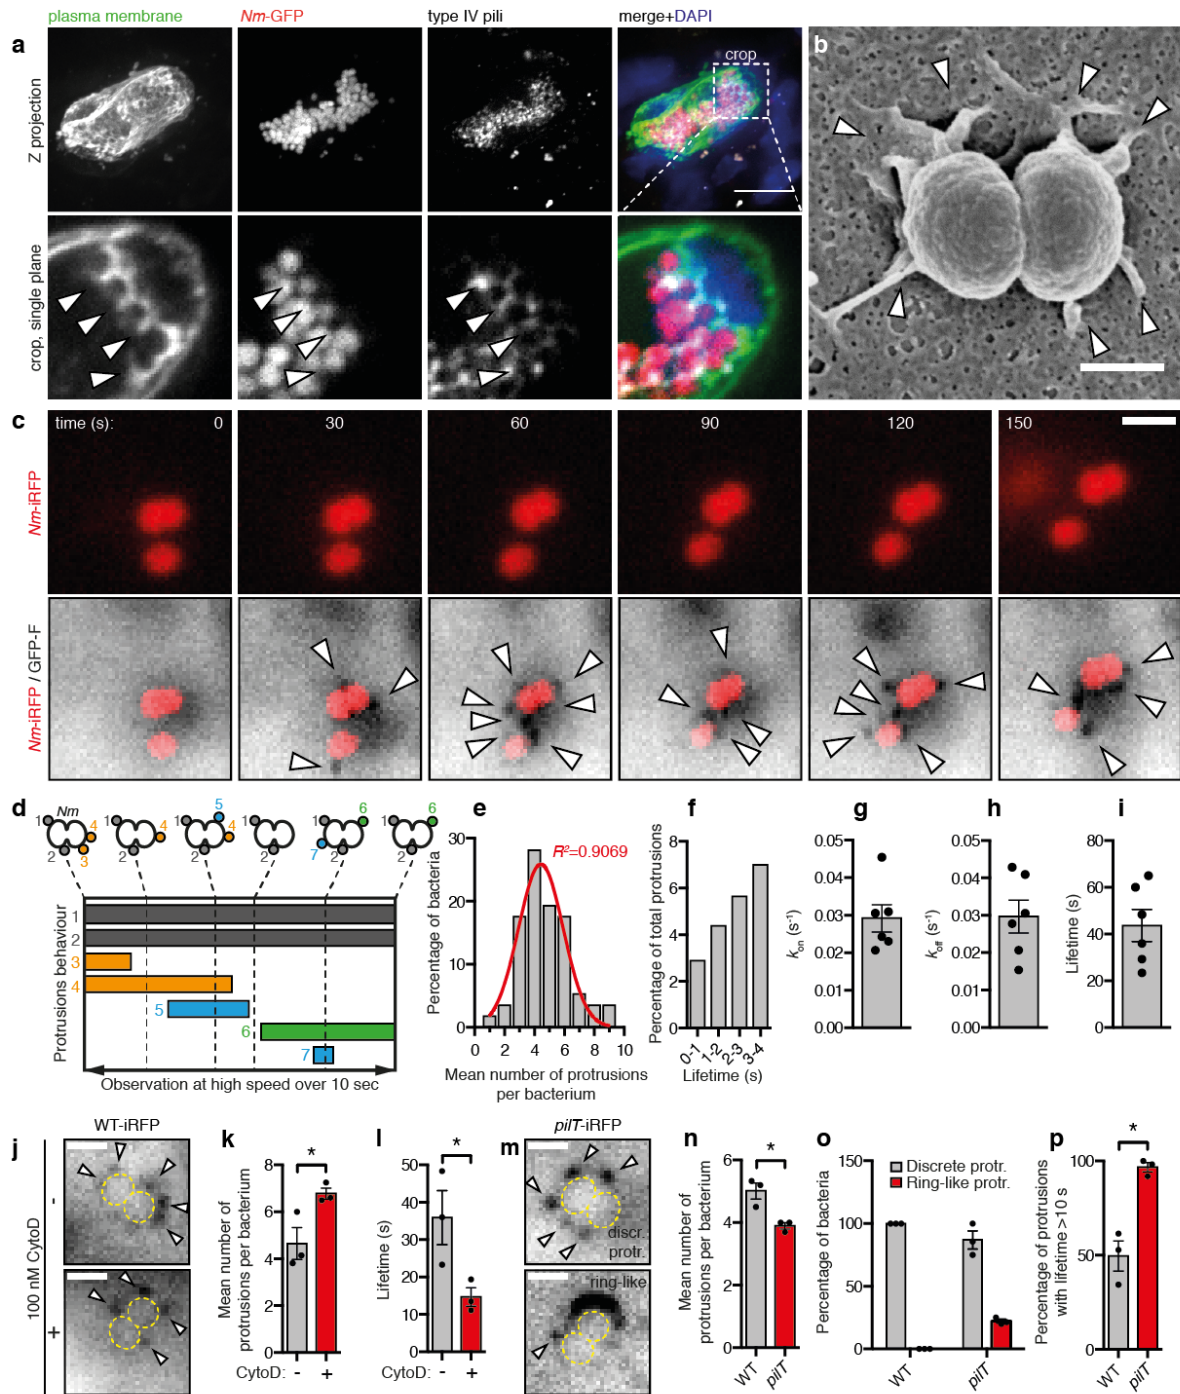

78

79 **Figure 1. Plasma membrane remodeling by *Nm* occurs *in vivo*, and is initiated at the level of the**  
 80 **individual bacterium *in vitro*.** (a) Histoimmunolabeling of human blood vessels in a mouse after 3h of  
 81 infection with *N. meningitidis*(*Nm*)-GFP showing plasma membrane protrusions co-localizing with T4P  
 82 between aggregated bacteria (arrowheads). Scale bar, 10 µm. Representative of n=2 mice. (b) Scanning  
 83 electron micrograph of an endothelial cell infected for 10 min. Arrowheads show plasma membrane  
 84 protrusions. Scale bar, 500 nm. Representative of n=2 independent experiments performed in duplicate. (c)

85 Oblique illumination live imaging of an endothelial cell expressing the membrane marker GFP-F (GFP-  
86 Farnesyl, inverted contrast) infected by individual *Nm*-iRFP. Arrowheads show dynamic plasma membrane  
87 protrusions. Scale bar, 2  $\mu\text{m}$ .  $n > 10$  independent experiments. **(d)** Types of plasma membrane protrusions  
88 observed in high speed oblique illumination imaging. **(e)** Frequency distribution (gray bars) and Gaussian  
89 fit (red line) of the number of protrusions per bacterium. **(f)** Frequency distribution of the number of plasma  
90 membrane protrusions with short observed lifetimes. **(g-i)** Plasma membrane protrusions on-rate ( $k_{on}$ ), off-  
91 rate ( $k_{off}$ ) and mean lifetime. Gray bars and error bars represent the mean  $\pm$ SEM over 57 bacteria in six  
92 independent experiments. Dots represent the mean values of 4-14 bacteria in each experiment. **(j-l)** Plasma  
93 membrane protrusions are still induced *Nm* in cytochalasin D-treated cells but have shorter lifetimes. Scale  
94 bars, 2  $\mu\text{m}$ . Bars and error bars in graphs represent the mean  $\pm$ SEM in three independent experiments.  
95 Dots represent the mean of each individual experiment. The total number of bacteria analyzed was 26 and  
96 15 in non-treated and treated cells, respectively. **(m-p)** Mutant bacteria deficient for pilus retraction trigger  
97 plasma membrane protrusions with altered morphologies and that are no longer dynamic. Scale bars, 2  $\mu\text{m}$ .  
98 Bars and error bars in graphs represent the mean  $\pm$ SEM of three independent experiments. Dots represent  
99 the mean of each individual experiment. The total number of bacteria analyzed was 31 WT-iRFP and 28  
100 *pilT*-iRFP.

101

102 Plasma membrane remodeling by meningococcus has only been observed in cultured  
103 cells. Therefore, we first sought to verify the existence of plasma membrane remodeling by  
104 meningococcus *in vivo*. Because of the human specificity of meningococcus, we used a  
105 recently developed humanized animal model of infection where human dermal vessels in skin  
106 is grafted onto immunodeficient mice<sup>12</sup>. Staining of human blood vessels during vascular  
107 colonization by *N. meningitidis* revealed that the surface of human endothelial cells was  
108 reorganized in the form of plasma membrane protrusions that intercalated between aggregated  
109 bacteria (Fig. 1a and Extended Data Fig. 1a and b), co-localized with T4P (Fig. 1a), and were  
110 enriched in F-actin (Extended Data Fig. 1a), paralleling earlier *in vitro* studies<sup>11,16,17</sup>. This data  
111 shows that the endothelial cell plasma membrane is remodeled during vascular colonization

112 by meningococcus *in vivo*, supporting the idea of a key role of plasma membrane remodeling  
113 in meningococcal pathogenesis, and warranting to further study its underlying mechanisms.

114 At an early stage of infection, meningococcus adheres to the endothelium as individual  
115 bacteria<sup>12</sup>. Scanning electron microscopy (SEM) showed plasma membrane remodeling  
116 occurred even at the level of single bacteria as several discrete protrusions surrounding the  
117 bacterial body (Fig. 1b). It should be noted that in standard SEM technical conditions used  
118 here type IV pili filaments are not conserved. Live cell oblique fluorescence imaging of  
119 endothelial cells expressing a fluorescent plasma membrane marker revealed that these  
120 discrete protrusions were elicited immediately upon adhesion of individual bacteria to host  
121 endothelial cells and, while remaining in close proximity with the bacterial body, had  
122 dynamic properties (Fig. 1c and Movie S1). F-actin was not detectable in these protrusions  
123 over time ranges of 5-10 minutes, demonstrated by the absence of LifeAct-mCherry signal  
124 (Movie S2). Over several bacterial division events, plasma membrane protrusions  
125 accumulated in the nascent microcolony as bacteria proliferate on top of the host cell  
126 (Extended Data Fig. 1c and Movie S3). By recording images at high speed, we could track the  
127 fate of each plasma membrane protrusion (Fig. 1d-f). Individual bacteria induced 4 to 5  
128 protrusions on average (Fig. 1e), some with lifetimes as short as 170 milliseconds (Fig. 1f).  
129 Within large bacterial aggregates, protrusions were no longer dynamic, and the rare  
130 disappearing events were restricted to the edge of the aggregate (Extended Data Fig. 1d and  
131 Movie S4), pointing to a possible maturation process stabilizing the interactions with the host  
132 cell. In individual bacteria, the growth and retraction rates of plasma membrane protrusions  
133 ( $k_{\text{on}}$  and  $k_{\text{off}}$ , respectively) were similar, indicating that there was a dynamic equilibrium  
134 between appearance and disappearance of the protrusions (Fig. 1g and h). The average  
135 lifetime for plasma membrane protrusions, equal to  $1/k_{\text{off}}$ , was  $44 \pm 7$  seconds (Fig. 1i).  
136 Bacteria induced significantly more plasma membrane protrusions in cells where F-actin was

137 depolymerized with cytochalasin D (CytoD) compared to control cells (Fig. 1j and k). This is  
138 in line with previous studies demonstrating that plasma membrane remodeling by  
139 meningococcus does not depend on actin polymerization<sup>11,16,17</sup>. Plasma membrane protrusions in  
140 CytoD-treated cells also showed significantly shorter lifetimes (Fig. 1l), further suggesting  
141 that F-actin stabilizes plasma membrane protrusions once they are formed and pointing to a  
142 role of membrane tension in this remodeling. Isogenic bacteria deficient in pilus retraction  
143 were still capable of inducing plasma membrane protrusions (*pilT* mutant, Fig. 1m and n),  
144 showing that forces exerted by pilus retraction were not required to remodel the host cell  
145 plasma membrane, as previously proposed for large bacterial aggregates<sup>17</sup>. Pilus retraction-  
146 deficient bacteria elicited discrete protrusions (Fig. 1n and Extended Data Fig. 2), as well as  
147 ring-like structures (Fig. 1m and o), reflecting more protrusions that are not resolved optically  
148 and larger protrusions (Extended Data Fig. 2) likely due to the higher amount of T4P produced  
149 by the *pilT* mutant. Strikingly, discrete membrane protrusions induced by *pilT* were no longer  
150 dynamic. Once they were formed, they never disappeared during the time of observation (Fig.  
151 1p), suggesting a causal link between pilus retraction and disappearance of plasma membrane  
152 protrusions. When taken together, these observations prompted us to hypothesize that plasma  
153 membrane protrusions are induced by a direct interaction of the plasma membrane with T4P  
154 fibers.



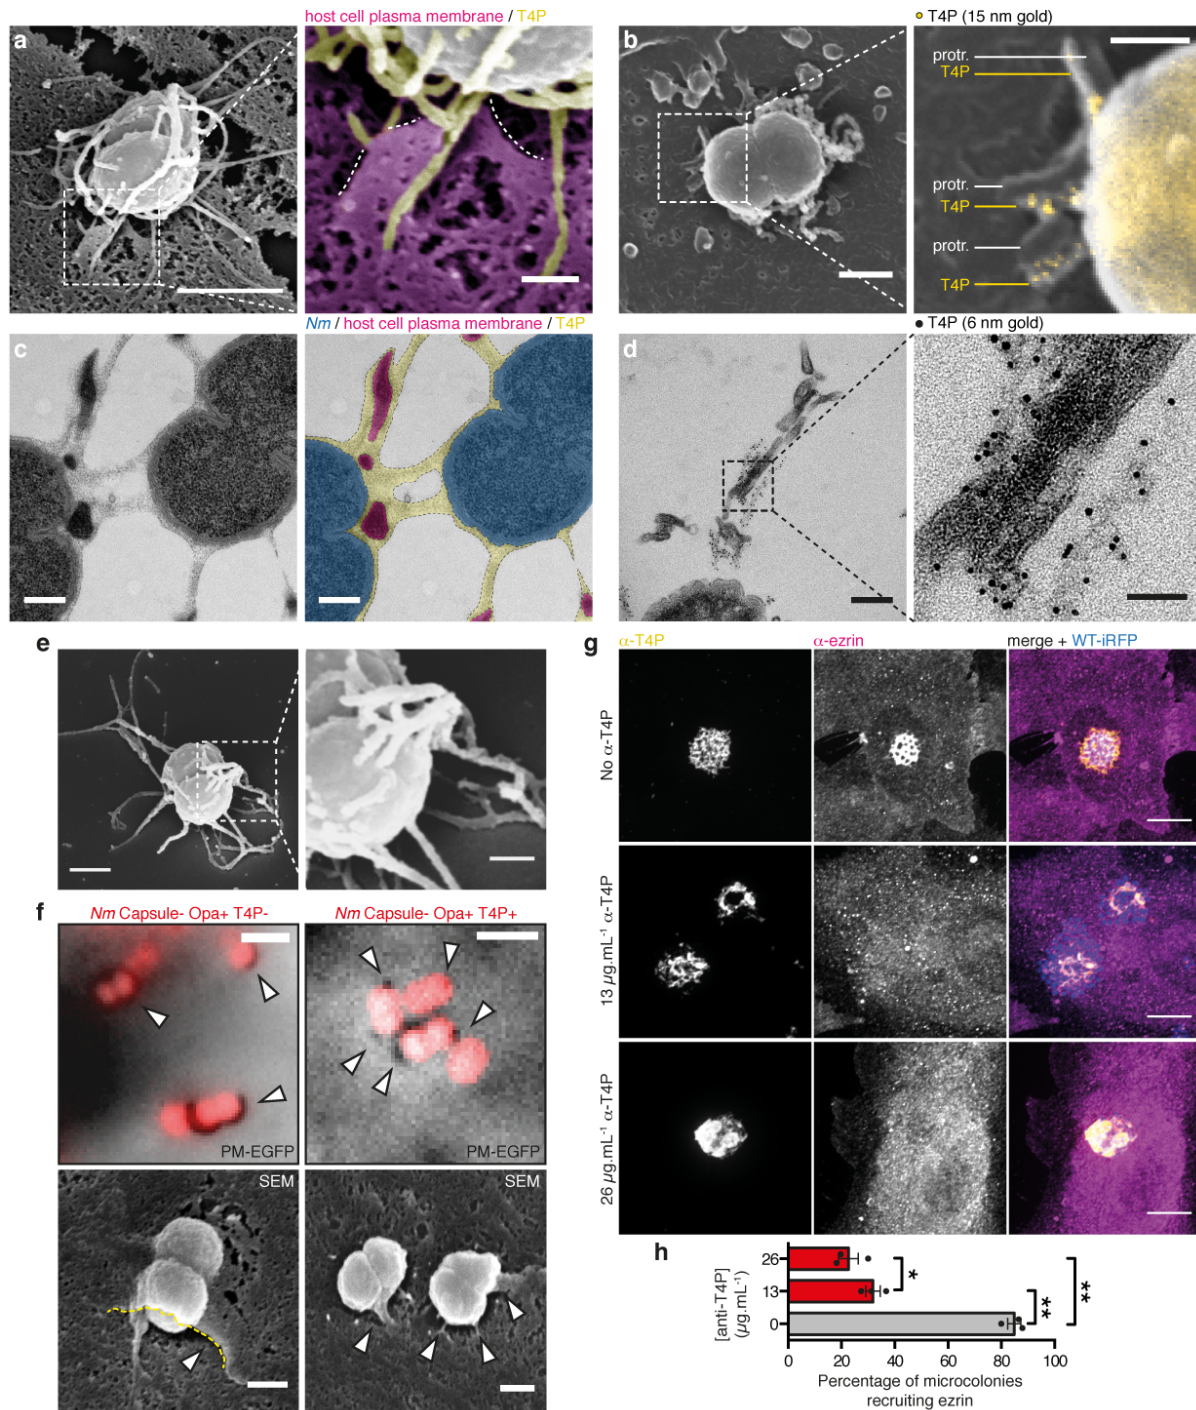

155

156 **Figure 2. The morphology of plasma membrane protrusions is dictated by the fiber-like morphology**  
 157 **of T4P. (a)** Scanning electron micrograph of an endothelial cell after 10 min infection and stabilization of  
 158 the T4P with a monoclonal antibody. Colorized crop shows plasma membrane protrusions (magenta, dotted  
 159 lined) attached alongside T4P fibers (yellow). Scale bars, 1 μm and 200 nm. n=2 independent experiments  
 160 performed in duplicate. **(b)** Same experiment after immunogold labeling of T4P. Protr., protrusions. Scale  
 161 bars, 500 nm and 200 nm. n=2 independent experiments performed in duplicate. **(c)** Transmission electron

162 micrograph of a microcolony of *Nm* after high pressure freezing and freeze substitution, showing plasma  
163 membrane protrusions embedded in a meshwork of T4P. Scale bars, 200 nm. Representative of multiple  
164 microcolonies in n=1 experiment. (d) Same experiment after immunogold labeling of T4P. Scale bars, 200  
165 nm and 50 nm. Representative of multiple microcolonies in n=1 experiment. (e) Scanning electron  
166 micrograph of the meshwork of T4P produced by an individual bacterium in culture. Scale bars, 500 nm  
167 and 200 nm. n=2 experiment. (f) Non-piliated Opa+ bacteria remodel the plasma membrane in a phagocytic  
168 cup-like fashion. Re-expression of T4P reverts the remodeling to a protrusion morphology. Scale bars, 2  
169  $\mu\text{m}$  (darkfield) and 500 nm (SEM). n=3 and 1 experiments. (g) An anti-T4P monoclonal antibody affects  
170 plasma membrane remodeling by *Nm*. Plasma membrane recruitment was assessed by the accumulation of  
171 ezrin. Scale bars, 10  $\mu\text{m}$ . Representative of n=3 experiments. (h) Quantification of the experiment in (g).  
172 Bars and error bars represent the mean  $\pm$ SEM. Dots represent the mean of individual experiments. 216 to  
173 240 microcolonies were counted per condition.

174

175 As a first evidence, 3D Structured Illumination Microscopy showed that plasma  
176 membrane protrusions were intertwined with T4P fibers within pairs of meningococci  
177 (Extended Data Fig. 3a and b) and larger bacterial aggregates (Extended Data Fig. 3c and d).  
178 Next, to gain ultrastructural information, we performed scanning electron microscopy after  
179 stabilization of T4P, which are otherwise fragile, by coating them with a monoclonal  
180 antibody. In these conditions, numerous fiber-shaped structures were visible (Fig. 2a,  
181 compare with Fig. 1b). These fibers stained positive for T4P in immunogold labeling assays  
182 (Fig. 2b) and showed direct association with plasma membrane protrusions (Fig. 2a and b).  
183 While the majority of T4P fibers formed a dense meshwork around bacterial bodies  
184 (Extended Data Fig. 4a), some other extended further away from bacteria and were as long as  
185 20  $\mu\text{m}$  (Extended Data Fig. 4b). However, plasma membrane protrusions were only seen  
186 associated with T4P in the vicinity of bacterial bodies, and not with T4P fibers adhering flat  
187 to the plasma membrane (Extended Data Fig. 4c). At longer times of infection, 2 hours post-

188 infection, high pressure freezing and freeze substitution prior to transmission electron  
189 microscopy revealed that plasma membrane protrusions were embedded in a dense  
190 meshwork-like structure that occupied the space between adjacent bacteria in the microcolony  
191 (Fig. 2c and Extended Data Fig. 5a). This meshwork was sometimes present around bacteria  
192 with no neighboring bacterium and still contained plasma membrane protrusions (Extended  
193 Data Fig. 5b). Immunogold labeling of T4P confirmed that this meshwork was made of T4P  
194 fibers (Fig. 2d). It should be emphasized that 2 hours after the initial contacts between pili and  
195 host cells bacteria have proliferated, the cells have moved and reorganized their cytoskeleton  
196 thus generating a complex picture that has been visualized in *Neisseria gonorrhoeae*<sup>21</sup>.  
197 Nevertheless, these data point to a scaffolding mechanism for plasma membrane remodeling  
198 exerted by T4P fibers. Several lines of evidence support this hypothesis. First, scanning  
199 electron microscopy of bacterial cultures showed that the T4P meshwork pre-existed adhesion  
200 with host cells (Fig. 2e). Second, adhesion of non-piliated bacteria to endothelial cells  
201 mediated by a non-fibrillar outer membrane adhesin, Opa, and its cellular receptor,  
202 CEACAM1, led to a phagocytic cup-shaped remodeling of the plasma membrane instead of  
203 discrete protrusions (Fig. 2f). SEM images show bacteria nearly engulfed in plasma  
204 membrane. Furthermore, re-expression of T4P reverts plasma membrane reorganization to  
205 dot-like protrusions, demonstrating a geometrical effect of T4P fibers on the shape of plasma  
206 membrane remodeling (Fig. 2f). Both membrane remodeling processes were again  
207 independent of F-actin polymerization (Extended Data Fig. 6). Finally, presence of an anti-  
208 T4P antibody during the infection of endothelial cells strongly impaired the ability of  
209 bacterial microcolonies to remodel the plasma membrane in a dose-dependent manner (Fig.  
210 2g and h), suggesting that plasma membrane remodeling by meningococcus depends on the  
211 adhesive properties of T4P fibers. Therefore, we propose that the remodeling of the plasma  
212 membrane is driven by adhesion forces between receptors in the membrane bilayer and T4P

213 fibers. The pilin monomer which is the main constituent of TFP was shown to interact with a  
 214 heterodimer formed by CD147 and the  $\beta$ 2-adrenergic receptor<sup>22</sup>.

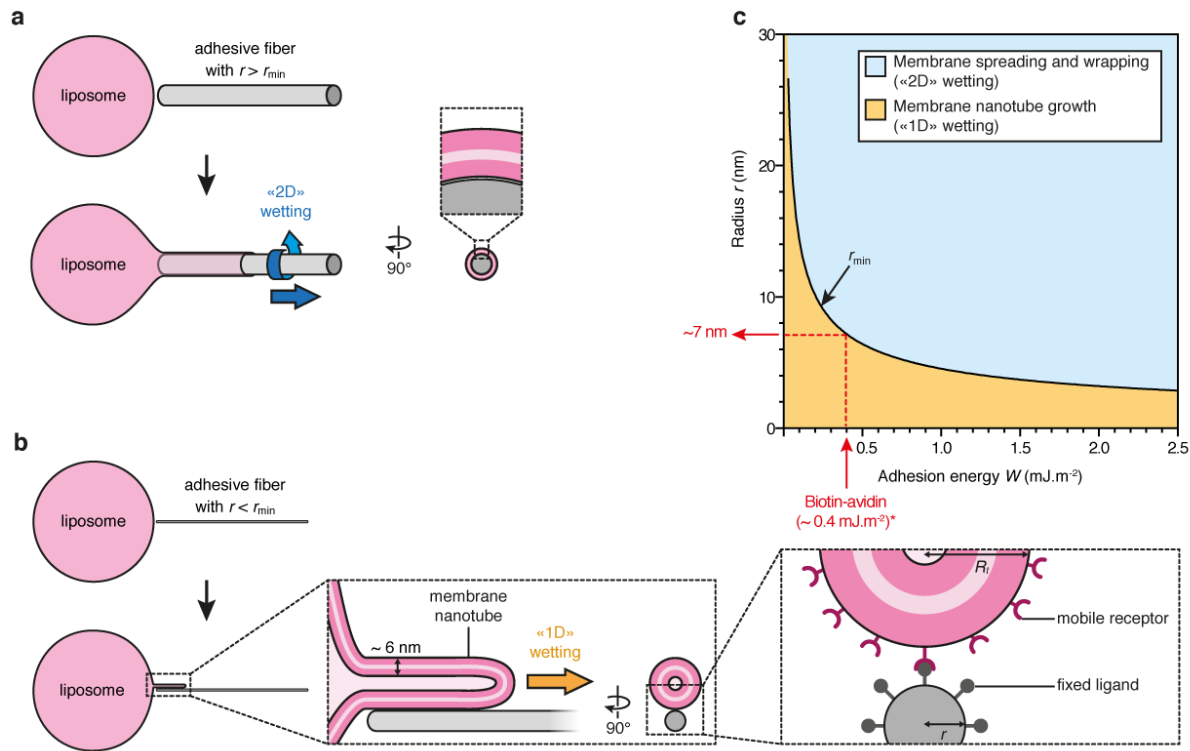

215

216 **Figure 3. Theoretical prediction of a novel regime of wetting for the spreading of a liposome on an**  
 217 **adhesive nanofiber.** (a) A liposome spreads on a fiber of radius  $r > r_{min}$  by "2D" membrane wetting,  
 218 where the bilayer wraps around the fiber. (b) On a fiber of radius  $r < r_{min}$ , the liposome cannot wrap the  
 219 fiber because of the curvature energy of the bilayer and is predicted to grow a tube of radius  $R_t$  along the  
 220 fiber, which we call "1D" membrane wetting. In the inset most to the right mobile receptors and fixed  
 221 ligands are indicated schematically, their size or distribution are not drawn to scale. (c) Phase diagram of a  
 222 membrane bilayer spreading on a fiber versus nanofiber radius  $r$  and adhesion energy  $W$ . The black line  
 223 corresponds to  $r_{min}$  and separates the "2D" (blue region) and "1D" (yellow region) membrane wetting  
 224 regimes. (\*) Considering a biotinylated actin filament decorated with NeutrAvidin and a molar ratio of  
 225 biotinylated actin:actin of 1:10 (Fig. 4), we estimated the adhesion energy  $W$  for the biotin-avidin complex  
 226 to be  $0.4$   $mJ.m^{-2}$ , yielding a minimum radius  $r_{min} = 7$  nm below which "2D" wetting can no longer occur  
 227 (See Materials and Methods).

228



229 We hypothesized that membrane remodeling occurs by membrane wetting along T4P  
230 fibers and explored the physical processes involved. It is known that a liposome spreads onto  
231 micrometer-scale adhesive glass fibers<sup>23</sup>. In this case, the free energy  $F_{2D}$  of the phospholipid  
232 bilayer spreading on a fiber of radius  $r$  is the sum of three contributions: (i) the curvature  
233 energy of the bilayer, (ii) the surface energy of the bilayer and (iii) the gain of adhesion  
234 energy between the bilayer and the fiber:  $F_{2D} = \frac{\pi\kappa_b L}{r} + 2\pi r\sigma L + 2\pi r(-W)L$ , where  $\kappa_b$   
235 and  $\sigma$  are the bending modulus and surface tension of the bilayer, respectively,  $L$  is the  
236 spreading length of the membrane along the fiber, and  $W$  is the adhesion energy of binding of  
237 mobile receptors on the membrane to ligands on the fiber. From  $F_{2D}$ , we derived the driving  
238 force of the spreading of the bilayer,  $f_d = 2\pi r(W - \frac{\kappa_b}{2r^2} - \sigma)$ . For the bilayer to spread,  $f_d$   
239 has to be positive. Therefore,  $f_d = 0$  defines a minimal value of the radius  $r_{min} = \sqrt{\frac{\kappa_b}{2(W-\sigma)}}$ .

240 In conclusion, the bilayer spreads and wraps around the fiber, a wetting process that is already  
241 well known, but only when  $f_d > 0$ , i.e. when  $r > r_{min}$  (Fig. 3a).

242 The case of  $r < r_{min}$ , which would correspond to spreading on a nanofiber, was not  
243 reported before. In this case, the bilayer cannot wrap around the fiber because the curvature  
244 energy becomes too high and a different scenario is predicted by the model: a membrane  
245 nanotube grows on top of the fiber, provided that the membrane tension is low enough (Fig.  
246 3b). In this case, the free energy  $F_{1D}$  of a membrane tube of radius  $R_t$  and length  $L_t$  growing  
247 along an adhesive fiber is the sum of the tube energy and the gain of the adhesion energy  
248  $W_t L_t$ ,  $F_{1D} = \frac{\pi\kappa_b L_t}{R_t} + 2\pi R_t \sigma L_t - W_t L_t$ . Here, the two first terms are the membrane curvature  
249 energy and the surface energy;  $W_t = \Gamma_l \cdot U$ , where  $U$  is the ligand-receptor binding energy  
250 and  $\Gamma_l$  is the number of ligands on the fiber per unit length. From the free energy  $F_{1D}$ , we  
251 derived the driving force acting on the membrane nanotube,  $f_L = -2\pi\sqrt{2\kappa_b\sigma} + W_t$  (See  
252 Materials and Methods). Here, the first term is the retraction force acting on the tube while the

253 second term is the driving force due to the adhesion along the fiber. If  $f_L > 0$ , *i.e.* when the  
254 surface tension  $\sigma$  of the membrane is sufficiently low, a membrane nanotube can grow along  
255 the fiber. To summarize, our model predicts that, for a given adhesion energy between  
256 receptors in the phospholipid bilayer and an adhesive fiber, there is a minimum radius  $r_{min}$  of  
257 the fiber above which the bilayer should spread by canonical membrane wetting ("2D") on the  
258 fiber, and below which the bilayer should spread by forming a nanotube along the fiber  
259 ("1D"). This last regime of tube formation is very different from other mechanisms of tube  
260 formation where tubes are actively pulled by molecular motors<sup>24,25</sup> or by external mechanical  
261 forces<sup>26,29</sup>. For 1D wetting, the driving force is provided by the gain of adhesion energy. We  
262 show in Figure 3c the phase diagram of membrane nanofiber wetting in the coordinates  $r$   
263 (fiber radius) and  $W$  (adhesion energy). The two regimes "2D" versus "1D" are separated by  
264 the curve  $r_{min} \cong \sqrt{\frac{\kappa_b}{2W}}$  in the limit  $\sigma \ll W$ . The dynamics of protrusions for 1D and 2D  
265 wetting is ruled by the balance between the driving force discussed above and the drag force  
266 associated to the flow of the lipids (See Materials and Methods). T4P fibers with their  
267 extremely small radius of 3 nm can thus potentially function in the "1D" membrane wetting  
268 regime. Indeed, in the context of live cells where membrane rigidity is higher ( $\kappa_b \approx$   
269  $50 k_B T^{30}$ ), the adhesion energy necessary for "2D" wetting, defined by  $r_{min} = r_{pilus} = 3 \text{ nm}$ ,  
270 is extremely large, of order  $10 \text{ mJ.m}^{-2}$ , which means that for T4P fibers we expect "1D"  
271 wetting to occur (Extended Data Fig. 7). This is supported by scanning electron micrographs  
272 showing plasma membrane protrusion along T4P fibers (Fig. 2a and b).

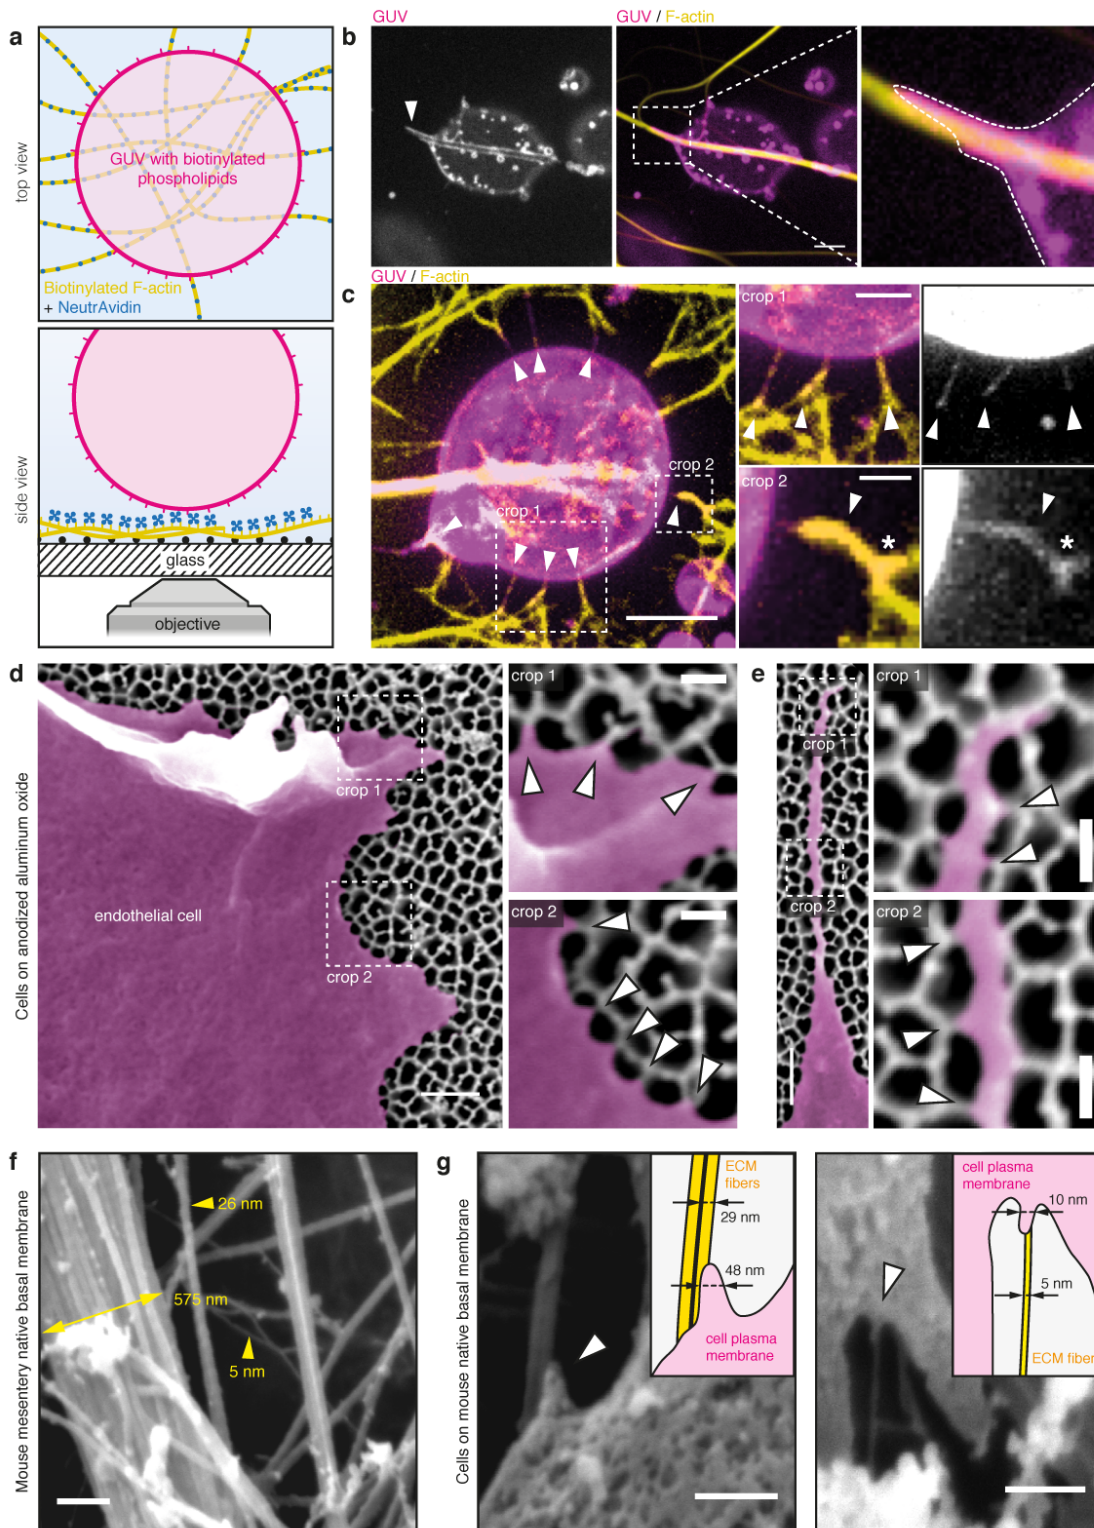

273

274 **Figure 4. Membrane wetting on fibers drives the deformation of giant unilamellar vesicles and**  
 275 **occurs in human endothelial cells. (a)** Schematic of the experimental setup where giant unilamellar  
 276 vesicles (GUVs) containing biotinylated phospholipids adhere to biotinylated F-actin fibers decorated with  
 277 NeutrAvidin. **(b)** GUVs spread on thick adhesive bundles (arrowhead) by wrapping around the fibers (crop,

278 dotted line), as predicted by the canonical "2D" membrane wetting regime. Scale bar, 5  $\mu\text{m}$ . (c) On thin  
279 adhesive fibers, GUVs extend small membrane tubes that align with the fibers (arrowheads), as predicted in  
280 the "1D" membrane wetting regime. Membrane tubes can branch when encountering branched adhesive  
281 fibers (crop 2, asterisk). Scale bars, 5  $\mu\text{m}$ , 2  $\mu\text{m}$  and 1  $\mu\text{m}$ . Representative of n=3 experiments. (d)  
282 Endothelial cells cultured on porous aluminum filters coated with an RGD peptide show local linear plasma  
283 membrane deformations that match with the thin pore walls (arrowheads). (e) Pore walls dictate the path  
284 followed by filopodia, where the plasma membrane is also found to deform locally when encountering a  
285 pore wall (arrowheads). Representative of n=2 experiments. Scale bars, 500 nm and 150 nm for the crops.  
286 (f) SEM shows that native basal membranes from mouse mesentery feature fibers with diameters down to 5  
287 nm. Scale bar, 250 nm. (g) Endothelial cells cultured on such extracellular matrices show nanoscale plasma  
288 membrane protrusions aligning on nanoscale fibers. Scale bars, 250 and 200 nm.

289

290 To test this theoretical model *in vitro* the use of purified pili and lipid vesicles was  
291 complicated by the necessity to insert a multimeric protein receptor in the lipid vesicles<sup>22</sup>. We  
292 rather used an assay consisting of model membranes (biotinylated giant unilamellar vesicles  
293 (GUVs) of typically 20  $\mu\text{m}$  diameter) interacting with model nanofibers consisting of  
294 biotinylated actin fibers decorated with NeutrAvidin and immobilized on a solid substrate.  
295 The diameter of single actin filaments, 7 nm, is similar to the diameter of T4P fibers.  
296 Confocal microscopy showed that biotinylated GUVs interacting with NeutrAvidin-coated  
297 filaments deformed along them in two different ways. On thick adhesive bundles, GUVs  
298 spread and wrapped around the fibers (Fig. 4b), similar to previous studies of GUVs  
299 spreading on glass microfibers<sup>23</sup> and consistent with the canonical "2D" membrane wetting  
300 described in our phase diagram (Fig. 3c). However, on thin adhesive nanofibers, GUVs  
301 tended to extend thin protrusions aligned along these fibers (Fig. 4c), consistent with the  
302 regime of membrane nanotube elongation that is predicted to occur on thin nanofibers (Fig.  
303 3c). Cryo-electron microscopy experiments demonstrated that when phospholipid vesicles

304 were mixed with adhesive nanofibers, membrane nanotubes were clearly in close apposition  
305 with the fibers rather than wrapped around them (Extended Data Fig. 8). Strikingly,  
306 membrane protrusions branched when encountering branched adhesive fibers (Fig. 4c),  
307 showing that the shape of the bilayer was governed by the architecture of the adhesive fibers.  
308 Interestingly, by taking reported values of the adhesion energy between biotin and avidin<sup>31,32</sup>,  
309 we found that the minimum radius  $r_{min}$  below which the membrane should spread on these  
310 adhesive nanofibers by nanotube elongation is approximately 7 nm (Fig. 3c, and see Materials  
311 and Methods), in agreement with our experimental observations.

312 Interaction with the extracellular matrix is another situation in which cells interact  
313 with nanofibers. To further validate our predictions in the context of the interaction of human  
314 cells with components of the extracellular matrix, we investigated how the plasma membrane  
315 of endothelial cells deforms on an RGD peptide-coated nanostructured solid substrate. To do  
316 so, endothelial cells were cultured on anodized aluminum oxide foils featuring 100 nm pores  
317 with pore walls of less than 15 nm mimicking fibers of the extracellular matrix (Fig. 4d and  
318 e). To reconstitute integrin-fibronectin adhesion without altering the nano-topography of the  
319 substrate, we sequentially coated the substrate with an azide functionalized PLL-PEG (azido-  
320 (poly-L-lysine-graft-poly[ethylene glycol], or APP) and a reactive RGD peptide (BCN-  
321 RGD)<sup>33</sup>. Scanning electron microscopy showed that the plasma membrane at the cell contour  
322 deformed periodically along the pore walls (Fig. 4d). Filopodia were also seen to follow the  
323 complex geometry of the pore walls along their whole length (Fig. 4e). Interestingly, the  
324 plasma membrane along filopodia also seemed to deform periodically when encountering a  
325 pore wall. To test if protrusions formed on natural ECM nanofibers we performed scanning  
326 electron microscopy on native basal membranes extracted from mouse mesentery (Fig. 4f).  
327 The extracellular matrices exhibited bundles of fibers of a few tens or hundreds of  
328 nanometers, but also fibers down to a few nanometers. When cultured on such matrices,



329 human endothelial cells showed nanoscale plasma membrane protrusions that aligned onto  
330 fibers of 5 to about 30 nm (Fig. 4g). Thus, this set of experiments shows that cell membranes  
331 can form protrusions when adhering on naturally occurring nanofibers such as those found in  
332 the ECM.

333

334 Taken together, these data show that adhesive nanofibers can drive the remodeling of  
335 biological membranes at the nanoscale because of a wetting phenomenon that falls into a new  
336 regime that we named "1D" membrane wetting. In the context of plasma membrane  
337 remodeling induced by *N. meningitidis* in human endothelial cells, we propose that adhesion  
338 to T4P fibers drives plasma membrane deformation by this mechanism (Extended Data Fig.  
339 9). This is consistent both with the fact that the process is F-actin independent<sup>11,16,17</sup>, and with  
340 the observation that actin polymerization occurs subsequent to membrane deformation<sup>17</sup>. A  
341 similar sequence is observed in membrane nanotube pulling experiments in which actin  
342 polymerizes in membrane nanotubes initially devoid of F-actin<sup>34,35</sup>.

343 Calculations based on our model indicate that the adhesion energy between T4P and  
344 the cell membrane should be smaller than 10 mJ.m<sup>2</sup> and the membrane tension should be  
345 smaller than a threshold value ( $\sigma_t$ ) corresponding to  $f_L = 0$  to be in the "1D" regime.  
346 Assuming pilin monomers are arranged in a helical pitch of 7 nm in the pilus fiber<sup>36</sup>, an  
347 estimation of the binding energy per pair of pilin monomer-cell receptor leads to a minimal  
348 value of approximately 100  $k_B T$  for "2D" wetting to occur. As a comparison, it can be  
349 estimated from atomic force microscopy measurements on *Pseudomonas aeruginosa* T4P that  
350 the binding energy is smaller, approximately 18  $k_B T$  (see Materials and Methods), which  
351 leads to an estimate of the driving force  $W_t$  in the order of 10 pN. Thus, membrane wetting on  
352 T4P is likely to enter the "1D" regime, provided that the tube retracting force is smaller than  
353  $W_t$ . The retraction forces of tubes have been measured for different cell types adhering on

354 substrates with various techniques and are in the range of a few to 20 pN<sup>37,39</sup>. Available  
355 estimates of key physical parameters are thus in agreement with the occurrence of “1D”  
356 wetting during *N. meningitidis* interaction with host cells.

357       Membrane deformation as discrete protrusions along T4P fibers could be seen as a  
358 way to prevent the formation of a continuous membrane cup, as seen for the zipper  
359 mechanism employed by *Listeria monocytogenes* or *Yersinia* spp. were receptor containing  
360 plasma membrane adheres to outer membrane invasins<sup>40,41</sup>, leading to bacterial engulfment.  
361 Therefore, "1D" wetting along filamentous adhesins could be a strategy to prevent efficient  
362 internalization into host cells. Of note, many prokaryotic species, including numerous human  
363 pathogens, also produce filamentous appendages which organize into dense meshworks of  
364 fibers<sup>42-53</sup> and which could possibly use a "1D" membrane wetting mechanism in the interaction  
365 with their environment or their immobilization on host cells.

366       Membrane nanotubes were already described to play important roles in other  
367 physiological as well as pathological cellular processes<sup>54,58</sup>. Our study therefore describes a new  
368 mechanism of membrane nanotubes formation that is central to the interaction between an  
369 infectious bacterium and its host cell, but also to normal cell physiology. Indeed, in  
370 eukaryotic multicellular organisms, cells interact with proteins of the extracellular matrix that  
371 exist as fibers with adhesive properties, such as collagen, fibrillin or fibronectin, with reported  
372 diameters as small as 10 nm<sup>9</sup>. Our data show that fibers of the extracellular matrix can be  
373 even smaller, down to 5 nm. Importantly, cells form plasma membrane protrusions on such  
374 nanofiber networks. Thus, it will be of interest to assess whether such an F-actin-independent  
375 "1D" membrane wetting phenomenon plays a role in cell migration through complex  
376 environments occurring during diverse biological processes such as development, immune  
377 response or cancer.

378 Our study highlights the notion that cells react to the topography of their environment  
379 at the nanoscale<sup>60,61</sup>. It is likely that the development of high resolution light and electron  
380 imaging techniques will help uncover the cell response to nano-topographical cues, in  
381 particular in the context of the interaction with complex fibrous environments.

382

### 383 **References**

- 384 1 McMahon, H. T. & Gallop, J. L. Membrane curvature and mechanisms of dynamic cell  
385 membrane remodelling. *Nature* **438**, 590-596, doi:nature04396 [pii]  
386 10.1038/nature04396 (2005).
- 387 2 Parton, R. G. & del Pozo, M. A. Caveolae as plasma membrane sensors, protectors and  
388 organizers. *Nat Rev Mol Cell Biol* **14**, 98-112, doi:nrm3512 [pii]  
389 10.1038/nrm3512 (2013).
- 390 3 McMahon, H. T. & Boucrot, E. Molecular mechanism and physiological functions of  
391 clathrin-mediated endocytosis. *Nat Rev Mol Cell Biol* **12**, 517-533, doi:10.1038/nrm3151  
392 (2011).
- 393 4 Levin, R., Grinstein, S. & Canton, J. The life cycle of phagosomes: formation,  
394 maturation, and resolution. *Immunol Rev* **273**, 156-179, doi:10.1111/imr.12439 (2016).
- 395 5 Ridley, A. J. Life at the leading edge. *Cell* **145**, 1012-1022,  
396 doi:10.1016/j.cell.2011.06.010 (2011).
- 397 6 Ham, H., Sreelatha, A. & Orth, K. Manipulation of host membranes by bacterial  
398 effectors. *Nat Rev Microbiol* **9**, 635-646, doi:nrmicro2602 [pii]  
399 10.1038/nrmicro2602 (2011).
- 400 7 Rossman, J. S. & Lamb, R. A. Viral membrane scission. *Annu Rev Cell Dev Biol* **29**,  
401 551-569, doi:10.1146/annurev-cellbio-101011-155838 (2013).



- 402 8 Sheppard, D. C. & Filler, S. G. Host cell invasion by medically important fungi. *Cold*  
403 *Spring Harb Perspect Med* **5**, a019687, doi:10.1101/cshperspect.a019687 (2014).
- 404 9 Charles-Orszag, A., Lemichez, E., Tran Van Nhieu, G. & Dumenil, G. Microbial  
405 pathogenesis meets biomechanics. *Curr Opin Cell Biol* **38**, 31-37,  
406 doi:10.1016/j.ceb.2016.01.005 (2016).
- 407 10 Dumenil, G. Revisiting the extracellular lifestyle. *Cell Microbiol* **13**, 1114-1121,  
408 doi:10.1111/j.1462-5822.2011.01613.x (2011).
- 409 11 Mikaty, G. *et al.* Extracellular bacterial pathogen induces host cell surface  
410 reorganization to resist shear stress. *PLoS Pathog* **5**, e1000314,  
411 doi:10.1371/journal.ppat.1000314 (2009).
- 412 12 Melican, K., Michea Veloso, P., Martin, T., Bruneval, P. & Dumenil, G. Adhesion of  
413 *Neisseria meningitidis* to dermal vessels leads to local vascular damage and purpura in a  
414 humanized mouse model. *PLoS Pathog* **9**, e1003139, doi:10.1371/journal.ppat.1003139  
415 PPATHOGENS-D-12-02365 [pii] (2013).
- 416 13 Join-Lambert, O. *et al.* Meningococcal interaction to microvasculature triggers the  
417 tissular lesions of purpura fulminans. *J Infect Dis* **208**, 1590-1597, doi:jit301 [pii]  
418 10.1093/infdis/jit301 (2013).
- 419 14 Melican, K. & Dumenil, G. Vascular colonization by *Neisseria meningitidis*. *Curr Opin*  
420 *Microbiol* **15**, 50-56, doi:S1369-5274(11)00178-0 [pii]  
421 10.1016/j.mib.2011.10.008 (2012).
- 422 15 Brandtzaeg, P. & van Deuren, M. Classification and pathogenesis of meningococcal  
423 infections. *Methods Mol Biol* **799**, 21-35, doi:10.1007/978-1-61779-346-2\_2 (2012).
- 424 16 Eugene, E. *et al.* Microvilli-like structures are associated with the internalization of  
425 virulent capsulated *Neisseria meningitidis* into vascular endothelial cells. *J Cell Sci* **115**, 1231-  
426 1241 (2002).

- 427 17 Soyer, M. *et al.* Early sequence of events triggered by the interaction of *Neisseria*  
428 meningitidis with endothelial cells. *Cell Microbiol* **16**, 878-895, doi:10.1111/cmi.12248 (2014).
- 429 18 Nassif, X. *et al.* Antigenic variation of pilin regulates adhesion of *Neisseria meningitidis*  
430 to human epithelial cells. *Mol Microbiol* **8**, 719-725 (1993).
- 431 19 Brissac, T., Mikaty, G., Dumenil, G., Coureuil, M. & Nassif, X. The meningococcal  
432 minor pilin PilX is responsible for type IV pilus conformational changes associated with  
433 signaling to endothelial cells. *Infect Immun* **80**, 3297-3306, doi:IAI.00369-12 [pii]  
434 10.1128/IAI.00369-12 (2012).
- 435 20 Imhaus, A. F. & Dumenil, G. The number of *Neisseria meningitidis* type IV pili  
436 determines host cell interaction. *Embo J*, doi:embj.201488031 [pii]  
437 10.15252/embj.201488031 (2014).
- 438 21 Gill, D. B., Spitzer, D., Koomey, M., Heuser, J. E. & Atkinson, J. P. Release of host-  
439 derived membrane vesicles following pilus-mediated adhesion of *Neisseria gonorrhoeae*. *Cell*  
440 *Microbiol* **7**, 1672-1683, doi:10.1111/j.1462-5822.2005.00584.x (2005).
- 441 22 Maissa, N. *et al.* Strength of *Neisseria meningitidis* binding to endothelial cells requires  
442 highly-ordered CD147/beta2-adrenoceptor clusters assembled by alpha-actinin-4. *Nat Commun*  
443 **8**, 15764, doi:10.1038/ncomms15764 (2017).
- 444 23 Borghi, N., Alias, K., de Gennes, P. G. & Brochard-Wyart, F. Wetting fibers with  
445 liposomes. *J Colloid Interf Sci* **285**, 61-66, doi:10.1016/j.jcis.2004.11.030 (2005).
- 446 24 Roux, A. *et al.* A minimal system allowing tubulation with molecular motors pulling on  
447 giant liposomes. *Proc Natl Acad Sci U S A* **99**, 5394-5399, doi:10.1073/pnas.082107299 (2002).
- 448 25 Leduc, C. *et al.* Cooperative extraction of membrane nanotubes by molecular motors.  
449 *Proc Natl Acad Sci U S A* **101**, 17096-17101, doi:10.1073/pnas.0406598101 (2004).
- 450 26 Evans, E. & Yeung, A. Hidden dynamics in rapid changes of bilayer shape. *Chem. Phys.*  
451 *Lipids*, 39-56 (1994).

- 452 27 Bozic, B., Svetina, S. & Zeks, B. Theoretical analysis of the formation of membrane  
453 microtubes on axially strained vesicles. *Phys. Rev. E*, 5834-5842 (1997).
- 454 28 Derényi, I., Jülicher, F. & Prost, J. Formation and interaction of membrane tubes. *Phys.*  
455 *Rev. Lett.*, 238101 (2002).
- 456 29 Rossier, O. *et al.* Giant vesicles under flows: extrusion and retraction of tubes.  
457 *Langmuir*, 575-584 (2003).
- 458 30 Mohandas, N. & Evans, E. Mechanical-Properties of the Red-Cell Membrane in  
459 Relation to Molecular-Structure and Genetic-Defects. *Annu Rev Bioph Biom* **23**, 787-818,  
460 doi:DOI 10.1146/annurev.bb.23.060194.004035 (1994).
- 461 31 Noppl-Simson, D. A. & Needham, D. Avidin-biotin interactions at vesicle surfaces:  
462 adsorption and binding, cross-bridge formation, and lateral interactions. *Biophys J* **70**, 1391-  
463 1401, doi:10.1016/S0006-3495(96)79697-2 (1996).
- 464 32 Merkel, R., Nassoy, P., Leung, A., Ritchie, K. & Evans, E. Energy landscapes of  
465 receptor-ligand bonds explored with dynamic force spectroscopy. *Nature* **397**, 50-53 (1999).
- 466 33 van Dongen, S. F. M., Maiuri, P., Marie, E., Tribet, C. & Piel, M. Triggering Cell  
467 Adhesion, Migration or Shape Change with a Dynamic Surface Coating. *Adv Mater* **25**, 1687-  
468 1691, doi:10.1002/adma.201204474 (2013).
- 469 34 Datar, A., Bornschlogl, T., Bassereau, P., Prost, J. & Pullarkat, P. A. Dynamics of  
470 membrane tethers reveal novel aspects of cytoskeleton-membrane interactions in axons.  
471 *Biophys J* **108**, 489-497, doi:10.1016/j.bpj.2014.11.3480 (2015).
- 472 35 Pontes, B. *et al.* Cell cytoskeleton and tether extraction. *Biophys J* **101**, 43-52,  
473 doi:10.1016/j.bpj.2011.05.044 (2011).
- 474 36 Kolappan, S. *et al.* Structure of the Neisseria meningitidis Type IV pilus. *Nat Commun*  
475 **7**, 13015, doi:10.1038/ncomms13015 (2016).

- 476 37 Dai, J. & Sheetz, M. P. Membrane tether formation from blebbing cells. *Biophys J* **77**,  
477 3363-3370, doi:10.1016/S0006-3495(99)77168-7 (1999).
- 478 38 Sens, P. & Plastino, J. Membrane tension and cytoskeleton organization in cell motility.  
479 *J Phys Condens Matter* **27**, 273103, doi:10.1088/0953-8984/27/27/273103 (2015).
- 480 39 Brochard-Wyart, F., Borghi, N., Cuvelier, D. & Nassoy, P. Hydrodynamic narrowing  
481 of tubes extruded from cells. *Proc Natl Acad Sci U S A* **103**, 7660-7663,  
482 doi:10.1073/pnas.0602012103 (2006).
- 483 40 Parida, S. K. *et al.* Internalin B is essential for adhesion and mediates the invasion of  
484 *Listeria monocytogenes* into human endothelial cells. *Mol Microbiol* **28**, 81-93 (1998).
- 485 41 Isberg, R. R., Voorhis, D. L. & Falkow, S. Identification of invasin: a protein that allows  
486 enteric bacteria to penetrate cultured mammalian cells. *Cell* **50**, 769-778 (1987).
- 487 42 Todd, W. J., Wray, G. P. & Hitchcock, P. J. Arrangement of pili in colonies of *Neisseria*  
488 *gonorrhoeae*. *J Bacteriol* **159**, 312-320 (1984).
- 489 43 Jude, B. A. & Taylor, R. K. The physical basis of type 4 pilus-mediated microcolony  
490 formation by *Vibrio cholerae* O1. *J Struct Biol* **175**, 1-9, doi:10.1016/j.jsb.2011.04.008 (2011).
- 491 44 Krebs, S. J. & Taylor, R. K. Protection and attachment of *Vibrio cholerae* mediated by  
492 the toxin-coregulated pilus in the infant mouse model. *J Bacteriol* **193**, 5260-5270,  
493 doi:10.1128/JB.00378-11 (2011).
- 494 45 Gil, H., Benach, J. L. & Thanassi, D. G. Presence of pili on the surface of *Francisella*  
495 *tularensis*. *Infect Immun* **72**, 3042-3047 (2004).
- 496 46 Sajjan, U. S., Sun, L., Goldstein, R. & Forstner, J. F. Cable (cbl) type II pili of cystic  
497 fibrosis-associated *Burkholderia* (*Pseudomonas*) *cepacia*: nucleotide sequence of the cblA  
498 major subunit pilin gene and novel morphology of the assembled appendage fibers. *J Bacteriol*  
499 **177**, 1030-1038 (1995).

- 500 47 Alteri, C. J. *et al.* Mycobacterium tuberculosis produces pili during human infection.  
501 *Proc Natl Acad Sci U S A* **104**, 5145-5150, doi:10.1073/pnas.0602304104 (2007).
- 502 48 Olsen, A., Jonsson, A. & Normark, S. Fibronectin binding mediated by a novel class of  
503 surface organelles on Escherichia coli. *Nature* **338**, 652-655, doi:10.1038/338652a0 (1989).
- 504 49 Collinson, S. K., Emody, L., Muller, K. H., Trust, T. J. & Kay, W. W. Purification and  
505 characterization of thin, aggregative fimbriae from Salmonella enteritidis. *J Bacteriol* **173**,  
506 4773-4781 (1991).
- 507 50 Alcantar-Curiel, M. D. *et al.* Multi-functional analysis of Klebsiella pneumoniae  
508 fimbrial types in adherence and biofilm formation. *Virulence* **4**, 129-138,  
509 doi:10.4161/viru.22974 (2013).
- 510 51 Kristich, C. J. *et al.* Development and use of an efficient system for random mariner  
511 transposon mutagenesis to identify novel genetic determinants of biofilm formation in the core  
512 Enterococcus faecalis genome. *Appl Environ Microbiol* **74**, 3377-3386,  
513 doi:10.1128/AEM.02665-07 (2008).
- 514 52 Jarrell, K. F., Ding, Y., Nair, D. B. & Siu, S. Surface appendages of archaea: structure,  
515 function, genetics and assembly. *Life (Basel)* **3**, 86-117, doi:10.3390/life3010086 (2013).
- 516 53 Perras, A. K. *et al.* Grappling archaea: ultrastructural analyses of an uncultivated, cold-  
517 loving archaeon, and its biofilm. *Front Microbiol* **5**, 397, doi:10.3389/fmicb.2014.00397  
518 (2014).
- 519 54 Abounit, S. *et al.* Tunneling nanotubes spread fibrillar alpha-synuclein by intercellular  
520 trafficking of lysosomes. *EMBO J* **35**, 2120-2138, doi:10.15252/embj.201593411 (2016).
- 521 55 Costanzo, M. *et al.* Transfer of polyglutamine aggregates in neuronal cells occurs in  
522 tunneling nanotubes. *J Cell Sci* **126**, 3678-3685, doi:10.1242/jcs.126086 (2013).
- 523 56 Marzo, L., Gousset, K. & Zurzolo, C. Multifaceted roles of tunneling nanotubes in  
524 intercellular communication. *Front Physiol* **3**, 72, doi:10.3389/fphys.2012.00072 (2012).

525 57 Sowinski, S. *et al.* Membrane nanotubes physically connect T cells over long distances  
526 presenting a novel route for HIV-1 transmission. *Nat Cell Biol* **10**, 211-219,  
527 doi:10.1038/ncb1682 (2008).

528 58 Zhu, S., Victoria, G. S., Marzo, L., Ghosh, R. & Zurzolo, C. Prion aggregates transfer  
529 through tunneling nanotubes in endocytic vesicles. *Prion* **9**, 125-135,  
530 doi:10.1080/19336896.2015.1025189 (2015).

531 59 Vakonakis, I. & Campbell, I. D. Extracellular matrix: from atomic resolution to  
532 ultrastructure. *Curr Opin Cell Biol* **19**, 578-583, doi:10.1016/j.ceb.2007.09.005 (2007).

533 60 Ruprecht, V. *et al.* How cells respond to environmental cues - insights from bio-  
534 functionalized substrates. *Journal of Cell Science* **130**, 51-61, doi:10.1242/jcs.196162 (2017).

535 61 Elkhatib, N. *et al.* Tubular clathrin/AP-2 lattices pinch collagen fibers to support 3D cell  
536 migration. *Science* **356**, doi:10.1126/science.aal4713 (2017).

537

### 538 **Acknowledgements**

539 This work was supported by the French ministry for research and higher education (ACO);  
540 the Integrative Biology of Emerging Infectious Diseases (IBEID) laboratory of excellence  
541 (GD) and the VIP European Research Council starting grant (GD). We gratefully  
542 acknowledge the Imagopole – Citech of Institut Pasteur (Paris, France) as well as the France–  
543 BioImaging infrastructure network supported by the French National Research Agency  
544 (ANR-10-INSB-04; Investments for the Future), and the Région Ile-de-France (program  
545 Domaine d’Intérêt Majeur-Malinf) for the use of the Zeiss LSM 780 Elyra PS1 microscope  
546 and the Zeiss Auriga scanning electron microscope. The authors greatly acknowledge the Cell  
547 and Tissue Imaging (PICT-IBiSA), Institut Curie, member of the French National Research  
548 Infrastructure France-BioImaging (ANR10-INBS-04), and the PICT-IBiSA Institut Curie  
549 (Paris, France). This work was supported by Institut Curie, Fondation pour la Recherche

550 Médicale (FRM FDT20170437130) and Ecole Doctorale Frontières du Vivant (FdV)–  
551 Programme Bettencourt (RS), ERC StG grant STARLIN (DMV), Centre National de la  
552 Recherche Scientifique (CNRS), and P. B. and F.B.-W. belong to the CNRS consortium  
553 CellTiss, to the Labex CelTisPhyBio (ANR-11-LABX0038) and to Paris Sciences et Lettres  
554 (ANR-10-IDEX-0001-02). F.C.T. was funded by the EMBO Long-Term fellowship (ALTF  
555 1527-2014) and Marie Curie actions (H2020-MSCA-IF-2014, project membrane-ezrin-actin).  
556 We thank J. Pernier for discussions, providing actin and advice on actin reconstitution. We  
557 thank Rafaele Attia and Jian (Olivier) Shi for technical help. We would like to thank Sven van  
558 Teeffelen for discussions and for help with the quantitative analysis of dark field microscopy.  
559 We would like to thank Dorian Obino for critical reading of the manuscript. The authors  
560 declare no competing financial interests.

561

## 562 **Author contributions**

563 A.C.-O. designed, conducted and analyzed most of the experiments, and prepared all the  
564 figures. G.D. designed the experiments, analyzed the data and supervised the project. F.-C.T.  
565 designed and performed the GUVs on adhesive actin fibers experiments. F.-C.T., F.B.-W. and  
566 P.B. performed the mathematical analysis of membrane wetting. D.B. performed and  
567 analyzed the micropatterns experiments. V.M. and A.C.-O. performed and analyzed the  
568 fluorescence experiments in mice. M.S. and A.C.-O. performed and analyzed the HPF-FS  
569 TEM experiments. A.M. and A.C.-O. conducted and analyzed the SEM experiments. A.S. and  
570 A.C.-O. performed and analyzed the 3D-SIM experiments. K.M. performed the TEM  
571 experiment in the mouse. R. S. prepared the mouse basal membranes. F.-C.T. and A.B.  
572 performed the cryo-EM experiments. C.M. constructed the pMGC13 plasmid. S.G. and P.L.  
573 produced the nanobody against T4P used in the mice experiments. M.P. contributed to the

574 design of the Anodisc experiments and to the interpretation of the data. A.C.-O., F.-C.T.,

575 F.B.-W., P.B. and G.D. wrote the manuscript. All the authors edited the manuscript.

576



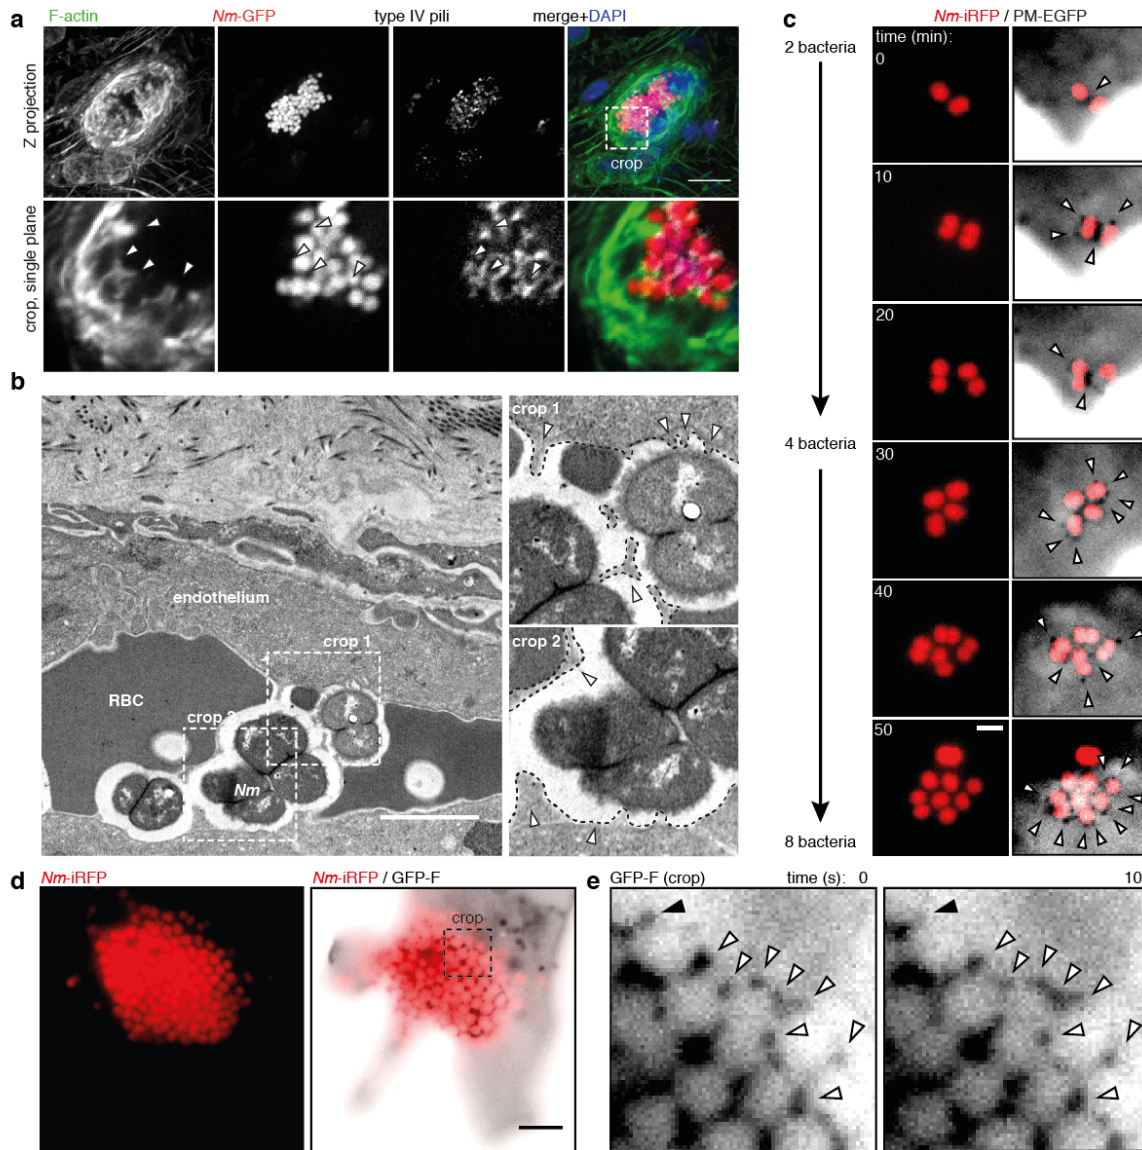

577

578 **Extended Data Figure 1. Further characterization of plasma membrane protrusions induced by *Nm***  
 579 ***in vivo* and by individual bacteria *in vitro*.** (a) Histoimmunolabeling of human blood vessels in a mouse  
 580 after 3h of infection with *N. meningitidis*(Nm)-GFP showing plasma membrane protrusions containing F-  
 581 actin (arrowheads). Scale bar, 10  $\mu$ m. Representative of n=2 mice. (b) Transmission electron micrograph  
 582 showing the plasma membrane of endothelial cells (dashed lines in the crops) remodeled beneath and  
 583 between aggregated bacteria in an infected human vessel (arrowheads). Scale bar, 2  $\mu$ m. n=1. (c) Oblique  
 584 illumination live imaging of a micropatterned endothelial cell expressing the plasma membrane marker  
 585 PalmitoylMyristoyl-EGFP (PM-EGFP, inverted contrast) infected by individual *Nm*-iRFP. Plasma  
 586 membrane protrusions initiated at the level of two bacteria are accumulated as bacteria divide on the host  
 587 cell surface and remain within the nascent microcolony (arrowheads). Scale bar, 2  $\mu$ m. Representative of

588 n=3 experiments. (d-e) Oblique illumination live imaging of an endothelial cell expressing the membrane  
589 marker GFP-F infected by an aggregate of *Nm*-iRFP shows that plasma membrane protrusions in this case  
590 are no longer dynamic (white arrowheads) with rare events of disappearing protrusions occurring at the  
591 edge of the bacterial aggregate (black arrowhead). Representative of n=3 experiments. Scale bar, 5  $\mu$ m.

592

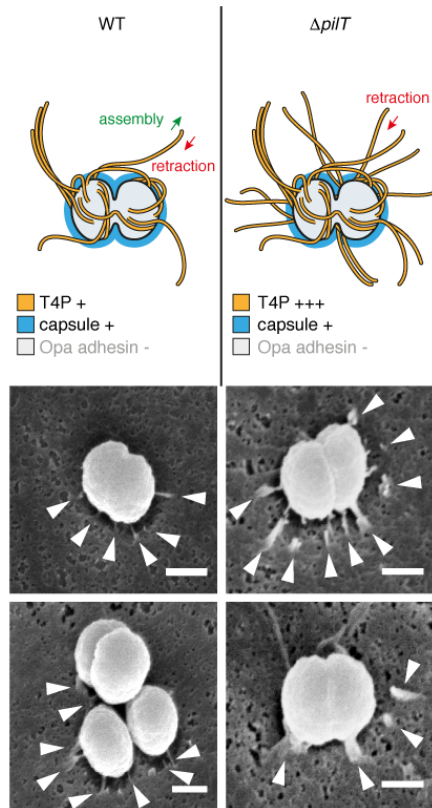

593

594 **Extended Data Figure 2. T4P retraction-deficient individual bacteria trigger plasma membrane**

595 **protrusions.** Scanning electron microscopy showing that the *pilT* mutant, which cannot retract T4P, still  
596 induces plasma membrane remodeling in the form of discrete protrusions as in the wild-type strain (WT).

597 However, either more protrusions or protrusion slightly larger are observed, likely due to the higher amount  
598 of T4P produced by the *pilT* strain. Note that T4P are not visible in this preparation. Scale bars, 500 nm.

599 n=1 experiment.

600

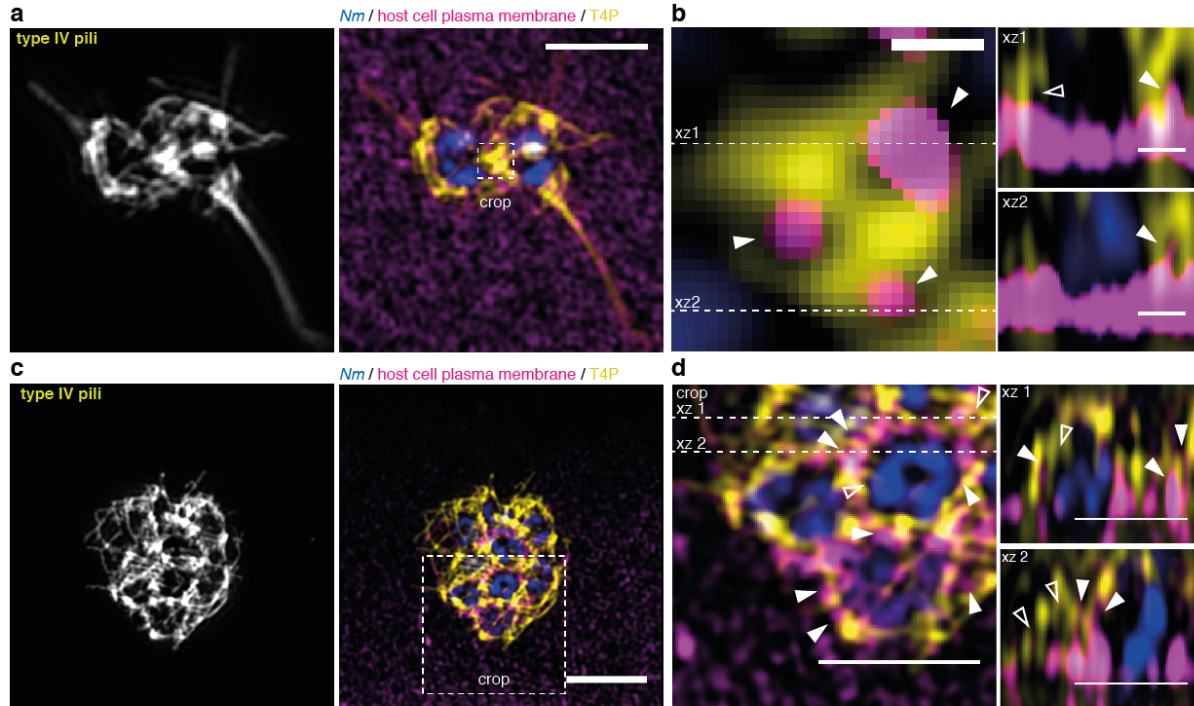

601  
602

603 **Extended Data Figure 3. T4P-plasma membrane interface visualized by 3D SIM.** (a) 3D Structure  
604 Illumination Microscopy (SIM) micrographs of a pair (a, b) and a small aggregate of 8 (c, d) meningococci  
605 (DAPI, blue) after 30 min infection of endothelial cells expressing the membrane marker PM-EGFP and  
606 immunostained for T4P and GFP. (a) and (c) show T4P detection and merged images in Z projections.  
607 Scale bars, 2 μm and 3 μm. (b) and (d) are cropped merged images and Z-sections showing details of T4P  
608 organization with empty spaces between fibers (empty arrowheads) and spaces occupied by plasma  
609 membrane protrusions (filled arrowheads). Scale bars in (b), 200 nm for the first inset then 500 nm. Scale  
610 bars in (d), 2 μm. n=3 experiments.

611



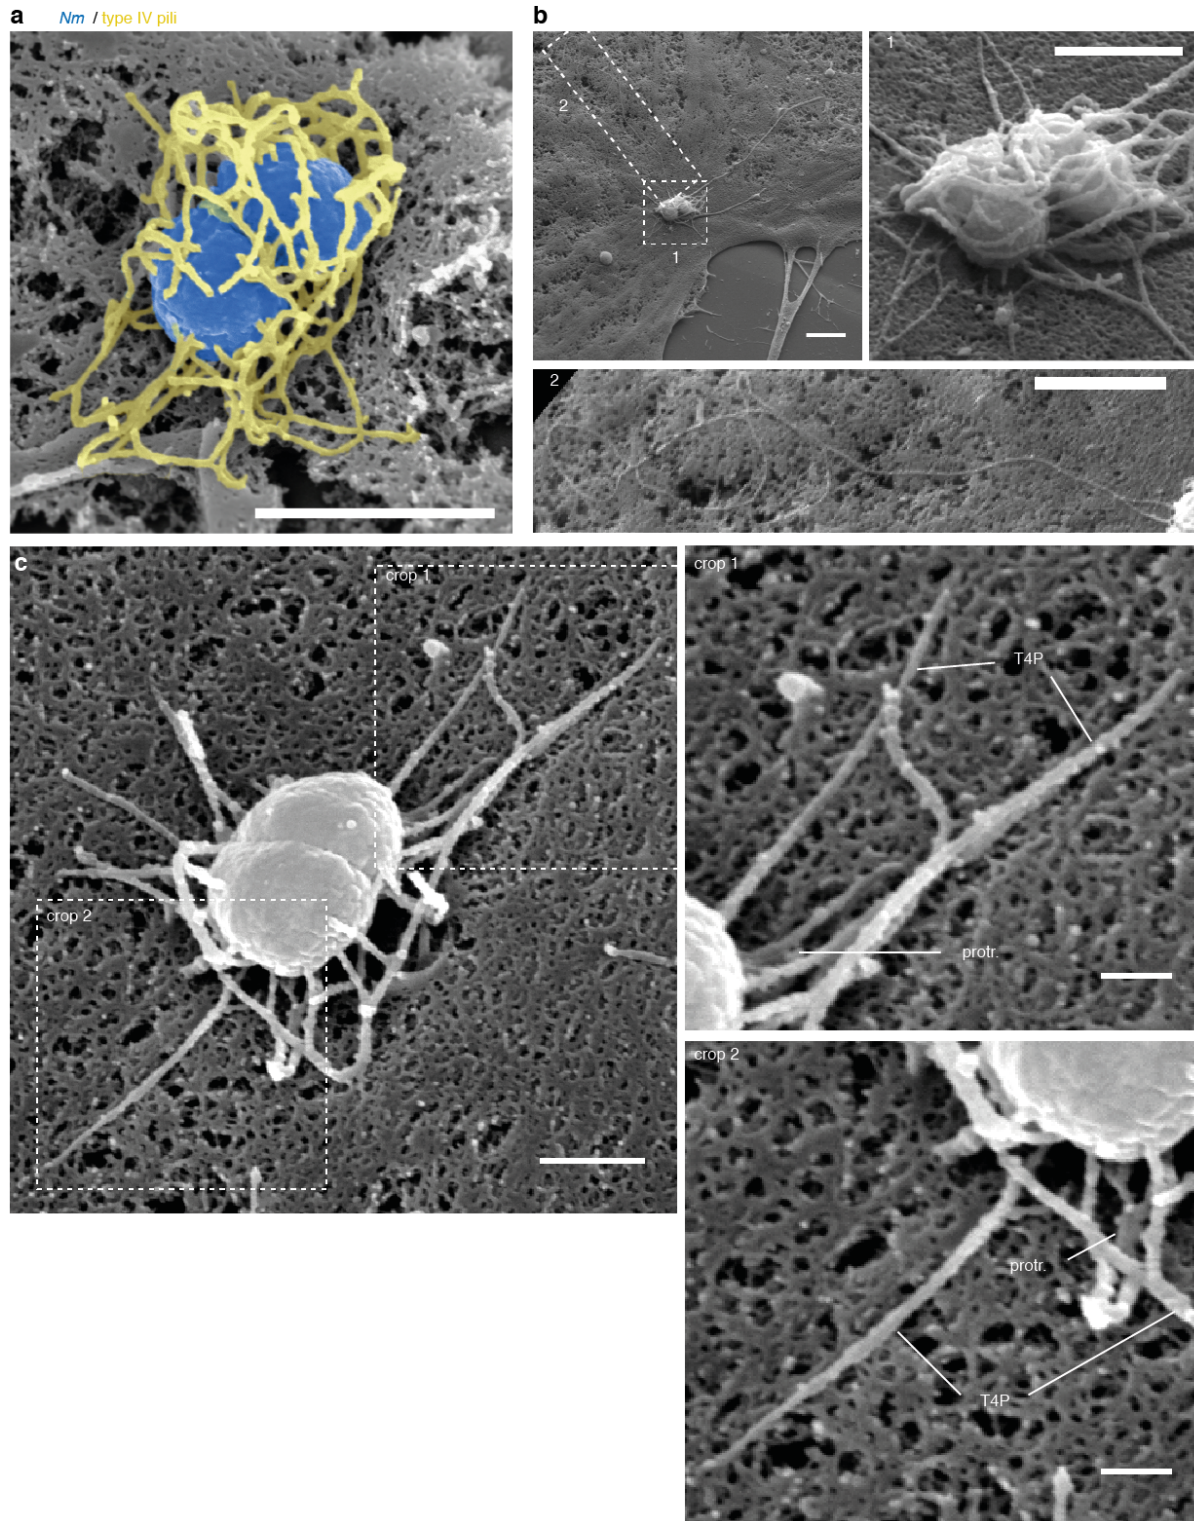

612

613 **Extended Data Figure 4. Additional examples of *Nm* T4P architecture and T4P-plasma membrane**  
614 **interface by SEM after stabilization of the T4P with a monoclonal anti-T4P. (a) Example of a single**  
615 **bacterium (false colored in blue) featuring a very dense meshwork of T4P (false colored in yellow) that**  
616 **encloses the bacterial body. Scale bar, 1  $\mu$ m. (b) Example of a pair of bacteria (crop 1) with particularly**



617 long T4P (crop 2). Scale bars, 10  $\mu\text{m}$  (large view) and 2  $\mu\text{m}$  (crops). (c) Example of a single bacterium  
618 where host cell plasma membrane forms protrusions near the bacterial body but not along T4P fiber away  
619 from the bacterium, as better seen in the crops. Protr., protrusions. Scale bars, 500 nm (whole picture) and  
620 200 nm (crops). n=2 experiments.

621

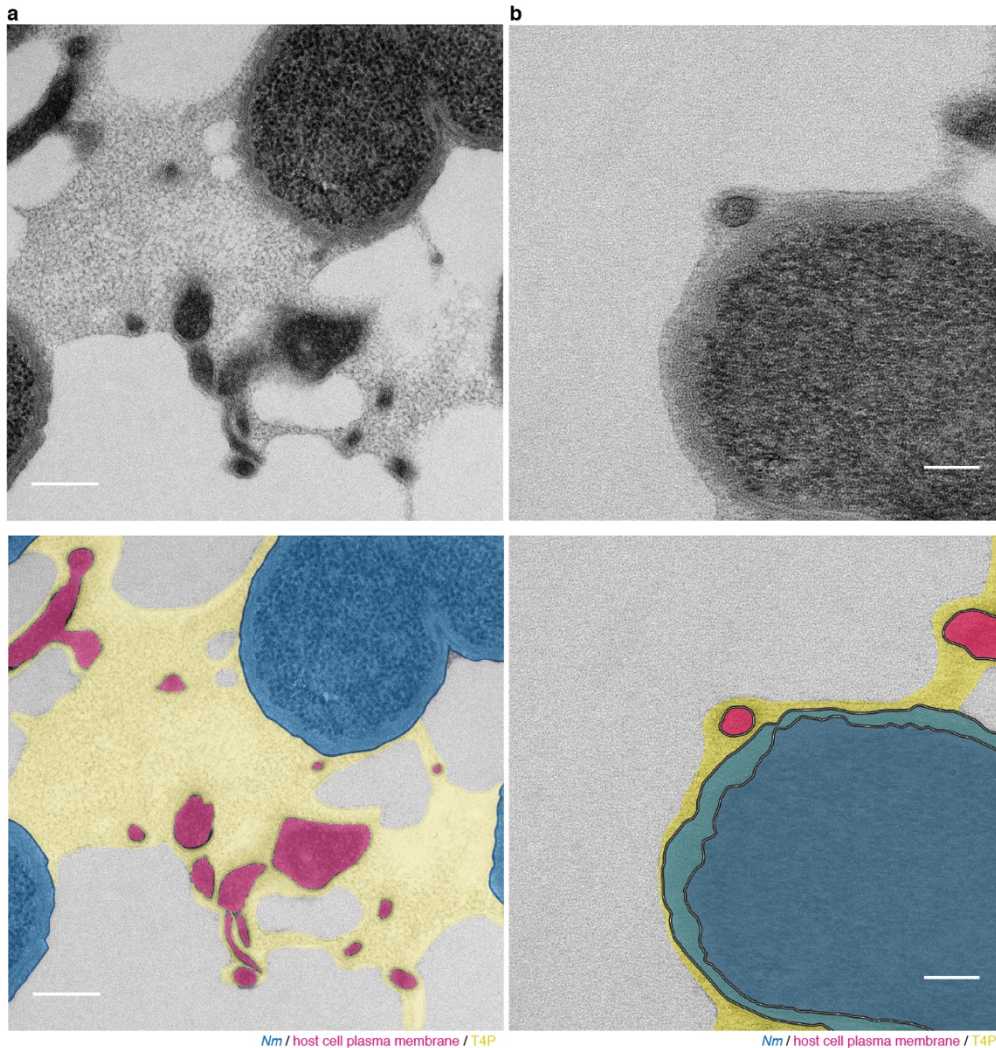

622  
623

624 **Extended Data Figure 5. Additional examples of the T4P-plasma membrane interface visualized by**  
625 **TEM after HPS-FS.** Transmission electron micrographs and colorized micrographs of microcolonies of  
626 *Nm* on endothelial cells after 2h of infection, high pressure freezing and freeze substitution. (a) Example of  
627 a dense meshwork of T4P embedding plasma membrane protrusions. Scale bar, 200 nm. (b) Example of a  
628 protrusion that lies in a layer of T4P at the periphery of a bacterium with no neighboring bacteria. Scale  
629 bar, 100 nm. Representative of multiple microcolonies in n=1 experiment.

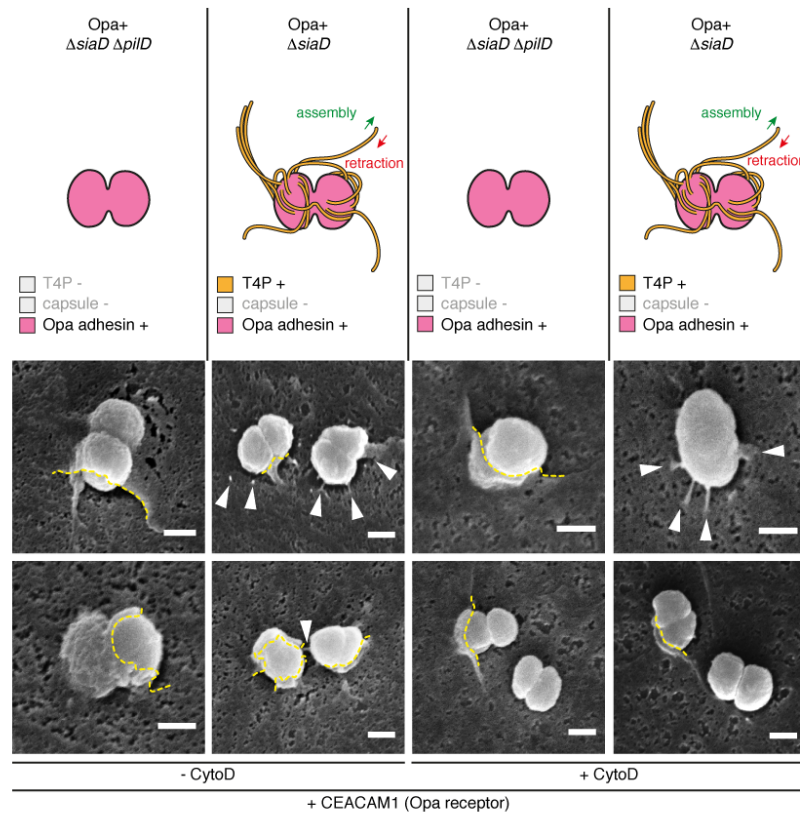

630

631 **Extended Data Figure 6. Adhesion via non-fibrillar adhesins leads to plasma membrane remodeling**

632 **as a cup-like structure.** Bacteria expressing the alternative Opa outer membrane adhesion elicit plasma

633 membrane remodeling in a cup-like fashion in cells expressing the Opa receptor CEACAM1. Re-

634 expression of T4P in the same genetic background leads to plasma membrane remodeling as a mix of

635 discrete protrusions and incomplete cups. Depolymerization of the F-actin cytoskeleton with cytochalasin

636 D (CytoD) prior to bacterial adhesion does not inhibit plasma membrane remodeling driven by adhesion to

637 either Opa or T4P adhesins. Scale bars, 500 nm. n=1 experiment.

638

639

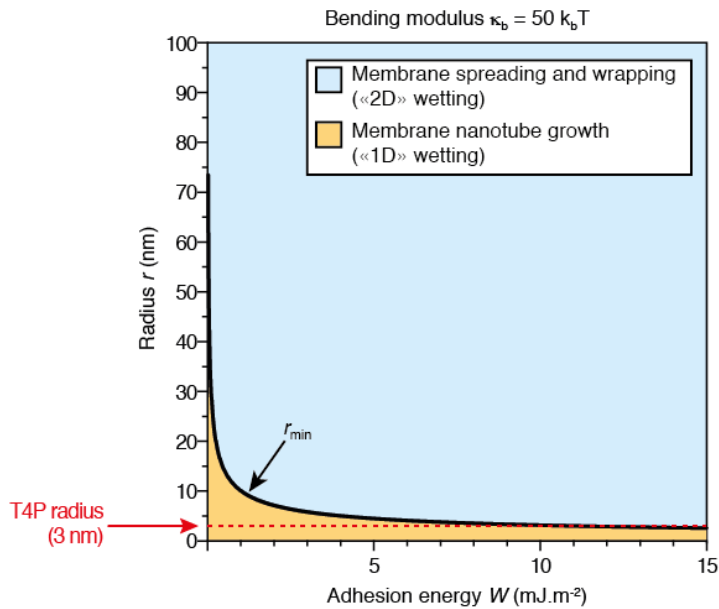

640

641 **Extended Data Figure 7. Theoretical prediction of "1D" and "2D" wetting regimes for the spreading**

642 **of a cell membrane on an adhesive nanofiber.** Phase diagram of a membrane bilayer spreading on a fiber

643 versus nanofiber radius  $r$  and adhesion energy  $W$ . The black line corresponds to  $r_{min}$  and separates the

644 "2D" (blue region) and "1D" (yellow region) membrane wetting regimes. Here, the bending modulus  $\kappa_b \approx$

645  $50k_B T$  is the one found in live cells<sup>30</sup>. The radius of a T4P fiber yields a theoretical minimal adhesion

646 energy of  $10 \text{ mJ}\cdot\text{m}^{-2}$  for "2D" cell membrane wetting to occur.

647

648

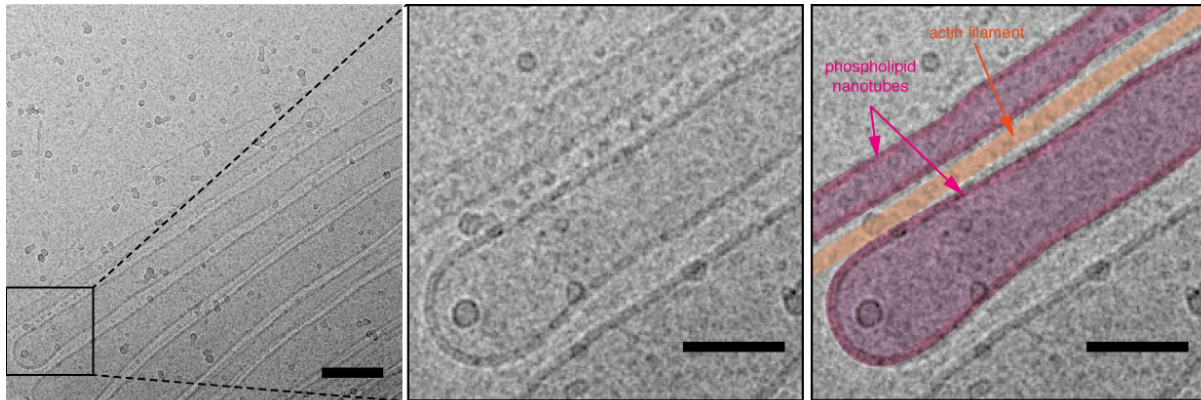

649

650

651 **Extended Data Figure 8. Cryo-electron microscopy of vesicles on nanofibers experiment. Here**

652 vesicles containing biotinylated phospholipids were mixed with biotinylated F-actin fibers decorated with

653 NeutrAvidin, and imaged by cryo-EM (left). Membrane nanotubes were visibly aligned along individual F-

654 actin filaments instead of wrapping around them (middle and right panels). Scale bars, 100 nm (left) and 50

655 nm (middle and right panels).

656



657

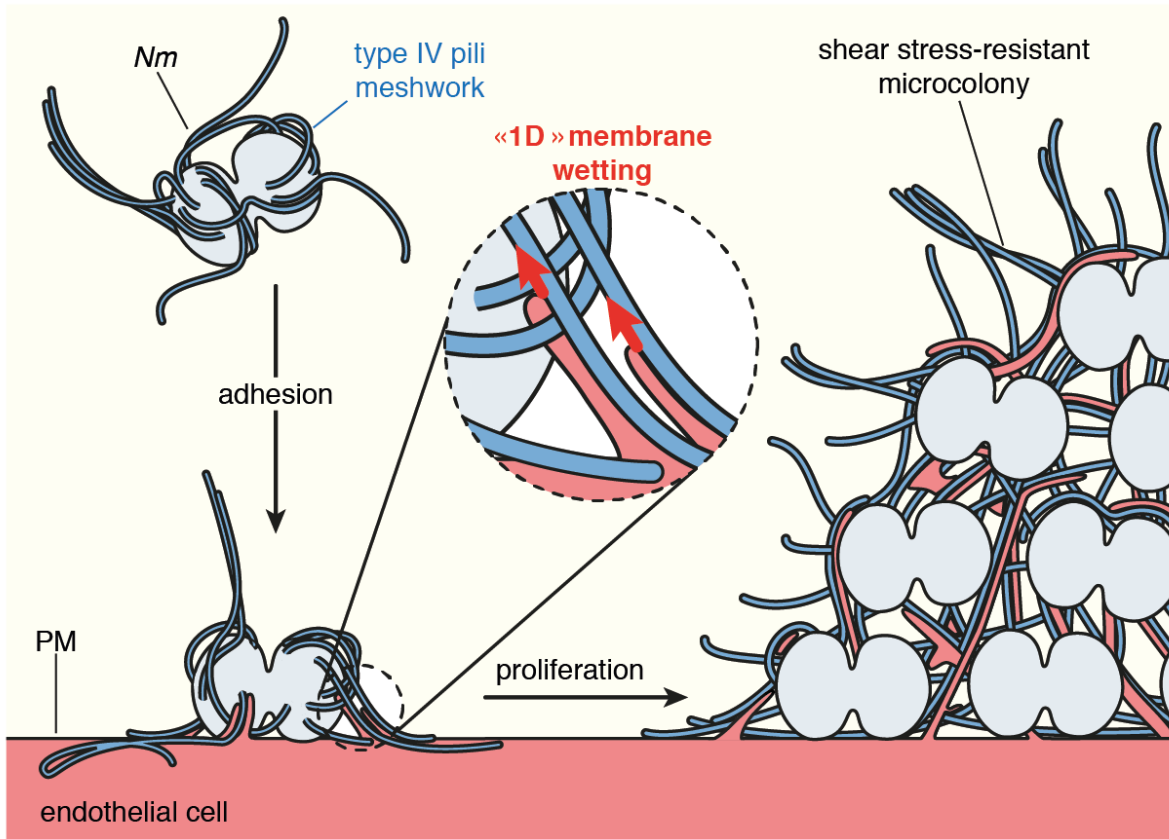

658

659 **Extended Data Figure 9. Working model for the mechanism of wetting-induced plasma membrane**  
660 **protrusions by *Nm* T4P fibers.** *Nm* produces T4P as a meshwork of fibers. Upon adhesion to the host  
661 endothelial cell, the high adhesiveness of T4P allows "1D" membrane wetting of the plasma membrane,  
662 and thus remodeling of the membrane alongside T4P fibers. As the bacteria proliferate and aggregate  
663 extracellularly, plasma membrane protrusions remain attached to T4P fibers and end up embedded in a  
664 dense extracellular T4P meshwork. This complex T4P-plasma membrane structure provides the  
665 microcolony with enough mechanical coherence to resist blood flow-generated shear stress.

666

## 667 **Materials and Methods**

### 668 **Ethics statement**

669 All experimental procedures involving animals were conducted in accordance with guidelines  
670 established by the French and European regulations for the care and use of laboratory animals  
671 (Décrets 87–848, 2001–464, 2001–486 and 2001–131 and European Directive 2010/63/UE)  
672 and approved by the local ethical committee Comité d’Ethique en matière d’Expérimentation  
673 Animale, Université Paris Descartes, Paris, France. No: CEEA34.GD.002.11. All surgery was  
674 performed under anesthesia, and all efforts were made to minimize suffering. For human skin,  
675 written informed consent was obtained and all procedures were performed according to  
676 French national guidelines and approved by the local ethical committee, Comité d’Evaluation  
677 Ethique de l’INSERM IRB 00003888 FWA 00005881, Paris, France Opinion: 11–048.

678

### 679 **Animals, grafting and infection**

680 Humanized SCID/Beige (SOPF/CB17 SCID BEIGE. CB17.Cg-Prkdc-Lyst/Crl) mice  
681 (Charles River, France) 5–8 weeks of age were used as described in earlier studies (Melican et  
682 al., 2013). Briefly, anesthetized mice were grafted with healthy human skin, including  
683 epidermis, dermis and dermal microvasculature. 3–4 weeks post graft, the tissue retained  
684 human morphology without inflammation.  $10^7$  CFU of GFP expressing bacteria were injected  
685 IV and the animals were sacrificed 2h post infection.

686

### 687 **Preparation of tissue samples for immunohistochemistry**

688 Tissues were fixed with 4% paraformaldehyde (PFA), frozen in OCT (Tissuetek) and sliced at  
689 10  $\mu$ m. Human vessels were stained for plasma membrane with the human specific *Ulex*  
690 *europaeus* agglutinin (UEA) lectin coupled to rhodamine (Vector Laboratories) and for F-  
691 actin with phalloidin coupled to AlexaFluor-568 (Invitrogen). Type IV pili were detected with

692 an in-house generated anti-PilE nanobody coupled to AlexaFluor-647 (AlexaFluor-647-NHS-  
693 ester, Invitrogen).

694

### 695 **Preparation of tissue samples for transmission electron microscopy**

696 Tissues were fixed with 4% PFA and 0.5% glutaraldehyde in 0.1M phosphate buffer, for 4h at  
697 room temperature. They were then transferred to 1% PFA in 0.1M phosphate buffer and  
698 incubated overnight at 4°C. Samples were next processed as for conventional TEM.

699

### 700 **Cell culture**

701 Human umbilical vein endothelial cells (HUVEC, Promocell) were maintained in Endo-SFM  
702 (human endothelial-SFM, Gibco) supplemented with 10% (v/v) heat-inactivated fetal bovine  
703 serum (FBS, PAA Laboratories) containing 10  $\mu\text{g}\cdot\text{mL}^{-1}$  endothelial cells growth supplement  
704 (ECGS, Alfa Aesar) and were used between passages 3 and 9.

705

### 706 **Bacterial strains and culture**

707 *Neisseria meningitidis* (*Nm*) serogroup C strain 8013 is a capsulated, piliated, Opa<sup>-</sup>, Opc<sup>-</sup>  
708 clinical isolate (Nassif et al., 1993). It was grown on GCB-Agar (Difco) plates containing  
709 Kellogg's supplements (Kellogg et al., 1968) and antibiotics when required (kanamycin, 100  
710  $\mu\text{g}\cdot\text{mL}^{-1}$ ; chloramphenicol, 5  $\mu\text{g}\cdot\text{mL}^{-1}$ ; spectinomycin, 50  $\mu\text{g}\cdot\text{mL}^{-1}$ ; erythromycin, 2  $\mu\text{g}\cdot\text{mL}^{-1}$ )  
711 at 37°C and 5% CO<sub>2</sub> under moist atmosphere. For infection experiments, GCB-Agar grown  
712 bacteria were resuspended in Endo-SFM supplemented with 10% FBS at an OD<sub>600</sub> of 0.05  
713 and cultured for 2 h with shaking at 37°C and 5% CO<sub>2</sub>. The GFP expressing strain was  
714 described elsewhere (Melican et al. 2013). A plasmid allowing stable expression of the iRFP  
715 near-infrared fluorescent protein (Filonov et al., 2011) in *Nm*, pMGC13, was constructed as  
716 follows: the sequence encoding the iRFP protein was PCR-amplified from the plasmid

717 pBAD/His-B-iRFP (a kind gift from Vladislav Verkhusha, Addgene plasmid #31855) with  
718 PacI and Sall restriction sites in 5' and 3' respectively and the ribosome binding site from *Nm*  
719 *pilE* gene just upstream of the start codon. The sequences for the primers are iRFP\_F2:  
720 TTAATTAAAGGAGTAATTTATGGGGGGTTCTCATCATCATCA and iRFP\_R3:  
721 GTCGACTCACTCTTCCATCACGCCGATCTGC (with restriction sites underlined and  
722 RBS from *pilE* in italic). The PCR fragment was then cloned in a pCRII-TOPO vector  
723 (Invitrogen), checked for sequence and subcloned in the pMGC5 plasmid that allows  
724 homologous recombination at an intergenic locus of the Nm chromosome and expression  
725 under the control of the constitutive *pilE* promoter (Soyer et al., 2014). The *pilT*-iRFP mutant  
726 strain deficient for type IV pili retraction was generated by homologous recombination of the  
727 chromosomal DNA of the *pilT* insertion mutant strain into the wild-type iRFP strain by  
728 natural transformation. The non-capsulated Opa<sup>+</sup>-*siaD*-iRFP and its non-piliated derivative  
729 Opa<sup>+</sup>-*siaD*-*pilD*-iRFP was generated by homologous recombination of the chromosomal  
730 DNA from *siaD* and/or *pilD* insertion mutant strains into a naturally occurring variant of  
731 2C43, which carries a *opaB* gene in the ON phase, by natural transformation.

732

### 733 **Cell transfection and plasmids**

734 5.10<sup>5</sup> HUVEC were electroporated with 4 µg plasmid DNA encoding either the enhanced  
735 green fluorescent protein fused to palmitoylation and myristoylation signals from the Lyn  
736 protein (PM-EGFP, kindly provided by Barbara Baird and David Holowka, Cornell  
737 University, Ithaca), a farnesylated GFP (GFP-F, Clontech), and/or LifeAct-mCherry (kindly  
738 provided by Guillaume Montagnac, Institut Curie, Paris) or the Carcinoembryonic antigen-  
739 related cell adhesion molecule 1 (CEACAM1, kindly provided by Alain Servin) with the  
740 Amaxa Nucleofector device (Amaxa Biosystem, Lonza).

741

742 **Oblique illumination (dark field) live cell imaging and high speed analysis**

743  $2.1 \cdot 10^4$  transfected cells were seeded in 96-well glass bottom plates (Sensoplate, Greiner  
744 BioOne) coated with  $3 \mu\text{g} \cdot \text{mL}^{-1}$  rat tail type I collagen and  $50 \mu\text{g} \cdot \text{mL}^{-1}$  human fibronectin  
745 (Sigma-Aldrich) and cultivated without ECGS. The next day, cells were infected with  
746 vortexed Endo-SFM-FBS grown bacteria at a MOI of 200 and gently rinsed after 10 min with  
747 Endo-SFM-FBS and screened for presence of adhering bacteria prior imaging. For inhibition  
748 of F-actin polymerization, cells were treated with 100 nM cytochalasin D in Endo-SFM-FBS  
749 for 20 min at  $37^\circ\text{C}$  and 5%  $\text{CO}_2$  prior to infection. Live imaging was performed on an Eclipse  
750 *Ti* inverted microscope (Nikon) equipped with a laser-based iLas2 Total Internal Reflection  
751 Fluorescence microscopy (TIRF) module (Roper Scientific) with lasers at 491 nm, 561 nm and  
752 647 nm and an ORCA03 digital CCD camera (Hamamatsu). Dark field images were obtained  
753 by using the TIRF module to get the illumination lasers with an incident angle of  $31.2^\circ$  in the  
754 widefield mode through an oil immersion 100x Apo TIRF objective with a 1.49 numerical  
755 aperture and alternatively an additional 1.5x lens. A 2x2 binning was used. To perform spatial  
756 high-resolution acquisition, a fast Z-piezo stage (Piezo Nano Z100) was adapted onto the  
757 stage of the microscope. For imaging in the stream mode, images were recorded at the camera  
758 frame rate (5 to 6 images per second) for 10 seconds. Focus was maintained with the Perfect  
759 Focus System (PFS, Nikon). All experiments were performed at  $37^\circ\text{C}$  in an incubation  
760 chamber adapted for the microscope (Microscope Temperature Control System, LIS). The  
761 set-up was controlled by the MetaMorph software (Molecular Devices). Times of appearance  
762 and disappearance of the plasma membrane protrusions around each bacterium were analyzed  
763 manually.  $k_{\text{on}}$  and  $k_{\text{off}}$  were calculated by dividing the total number of appearing or  
764 disappearing protrusions in all the bacteria of a given experiment by the total number of  
765 protrusions observed and by 10 seconds, and were consequently expressed in  $\text{s}^{-1}$ . The mean

766 lifetime for plasma membrane protrusions was calculated as the inverse of  $k_{\text{off}}$  and was  
767 therefore expressed in seconds.

768

### 769 **Oblique illumination live cell imaging of HUVEC on micropatterns**

770 Micropatterning on glass coverslips was performed as previously described<sup>62</sup>. Briefly, after  
771 plasma activation (Plasma Cleaner, Harrick), we passivated the glass with PLL-g-PEG  
772 (Surface Solutions GmbH, 0,1 mg.mL<sup>-1</sup> in 10 mM HEPES pH 7.4) for 30 min. After washing  
773 with water, we illuminated the surface with deep UV light (UVO Cleaner) through a  
774 chromium synthetic quartz photomask (Toppan). For imaging, we used channel-shaped sticky  
775 slides (Ibidi) that we bound on top of micropatterned coverslips. The home built chambers  
776 were sterilized by 10 minutes UV exposure under the hood. Finally, we incubated 1h with  
777 human fibronectin (50 µg.ml<sup>-1</sup> in water) and seeded PM-EGFP expressing HUVEC cells at a  
778 density of 50,000 cells per channel. 1h post seeding, cells were rinsed 3 times with fresh  
779 Endo-SFM to get rid of non-adhering cells, and cultured overnight. For infection, iRFP and  
780 mCherry wild-type bacteria from liquid cultures were vortexed and loaded into the channels  
781 in a 1:10 ratio to a final MOI of 400. Samples were incubated for 10 minutes at 37°C and 5%  
782 CO<sub>2</sub> and then rinsed thoroughly 3 times with fresh Endo-SFM to remove non-adhering  
783 bacteria. To follow membrane remodeling during bacterial proliferation, oblique imaging with  
784 491, 561 and 642 nm lasers was performed with a 100X ApoTIRF objective (Z-stacks: 1 µm  
785 steps over 10 µm; time-lapse: 10 min time frame over 10h).

786

### 787 **Scanning Electron Microscopy (SEM)**

788 1,5.10<sup>5</sup> HUVEC infected with *Nm* for 10 min at a MOI of 400 or bacteria alone cultured on  
789 12 mm glass slides were chemically pre-fixed by addition of one volume of pre-warmed 8%  
790 PFA in 0,1M HEPES pH 7.4 and incubated at room temperature for 45 min. After three

791 washing steps in HEPES, type IV pili were immunostained or not after 20 min blacking in  
792 HEPES-0.2% gelatin (HEPES-G) with 1,2  $\mu\text{g.mL}^{-1}$  20D9 antibody and a fluorescent  
793 secondary antibody or 2,4  $\mu\text{g.mL}^{-1}$  20D9 antibody and a secondary antibody coupled to 15  
794 nm colloidal gold particles (EM.GMHL15, BBI Solutions) diluted 1:30. HEPES was used  
795 instead of PBS in all steps. Infected cells were then post-fixed with 2.5% glutaraldehyde in  
796 HEPES, overnight at 4°C, washed in HEPES, post-fixed with 1% OsO<sub>4</sub> in HEPES for 1h,  
797 washed in distilled water, dehydrated in graded series of ethanol (25, 50, 75, 90 and 100%),  
798 critical point dried with Leica EM CPD300, mounted on aluminum stubs and sputter-coated  
799 with 20 nm gold/palladium with a Gatan PEC 682 gun ionic evaporator. SEM was performed  
800 in an Auriga scanning microscope (Carl Zeiss) operated at 7kV with an in-lens secondary  
801 electrons detector. For immunogold labelled samples, images were simultaneously acquired  
802 through the secondary electrons detector and the backscattered electrons detector at 20kV.  
803 Colorized images were generated with Adobe Photoshop.

804

805 **High pressure freezing, freeze substitution and transmission electron microscopy (HPF-**  
806 **FS-TEM)**

807 3x0.05 mm sapphire disks (M. Wohlwend GmbH) were cleaned in 100% ethanol, carbon  
808 coated in a Baltec MED 010 evaporator, baked at 130°C for 8h, glow discharged for 5 sec in a  
809 Harrick PDC-32G-2 air plasma cleaner at low radiofrequency and coated immediately with  
810 2,5  $\mu\text{g.mL}^{-1}$  rat tail type I collagen and 50  $\mu\text{g.mL}^{-1}$  human fibronectin. Disks were seeded  
811 with  $1,5 \cdot 10^5$  cells in 24-well plates. The next day, cells were infected with *Nm* for 2h at a  
812 MOI of 400 and chemically pre-fixed by addition of one volume of a mix of pre-warmed 8%  
813 PFA and 1% EM-grade glutaraldehyde in 0,1 M HEPES pH 7.4 and incubated at room  
814 temperature for 45 min. Cells were rinsed three times in 0,1 M HEPES. Disks were then  
815 spaced by a golden O-ring, sandwiched between a 0.4 mm and a 0.5 mm copper spacer, high



816 pressure frozen in a Baltec HPM 010 and stored in liquid nitrogen. Samples were freeze  
817 substituted in a RMC Boeckler FS-8500 with a mix of 1% OsO<sub>4</sub>, 0.1% uranyl acetate and 5%  
818 water in glass distilled acetone. Freeze substitution cycle was as follows: -90°C for 1h, 2.5°C  
819 increase per hour for 16h, -50°C for 30 min, 15°C increase per hour for 2h, -20°C for 30 min,  
820 10°C increase per hour for 2h and 0°C for 1h. After four washes in acetone, sample were  
821 embedded in Epon (Epon 812, AGAR1031 kit, hard formula, Agar 100). Alternatively, type  
822 IV pili were immunogold labelled before embedding. In this case, cells were chemically pre-  
823 fixed with 4% PFA and 0.1% glutaraldehyde (final concentrations), rinsed three times in  
824 HEPES, quenched with 50 mM NH<sub>4</sub>Cl in HEPES for 5 min, blocked with HEPES-G for 20  
825 min, incubated with 12 µg.mL<sup>-1</sup> 20D9 antibody in HEPES-G for 1h, washed twice in HEPES-  
826 G, incubated with goat anti-mouse antibody coupled to 6 nm colloidal gold particles  
827 (EM.GMHL6, BBI Solutions) diluted 1:30 in HEPES-G for 30 min, washed five times in  
828 HEPES-G and post-fixed with 1% glutaraldehyde in HEPES for 15 min. Samples were then  
829 high pressure frozen and freeze substituted as described above. Ultrathin sections of 60 nm  
830 nominal thickness were cut with a Leica EM UC7 ultramicrotome and collected on carbon  
831 coated, formvar-supported hexagonal copper grids, contrasted with 4% uranyl acetate and 3%  
832 Reynold's lead citrate and imaged in a FEI Tecnai T12 transmission electron microscope  
833 operated at an accelerating voltage of 120 kV.

834

### 835 **Immunofluorescence on 2h infected cells**

836 1,5.10<sup>5</sup> HUVEC were cultured in 96-well glass bottom plates coated with 2,5 µg.mL<sup>-1</sup> rat tail  
837 type I collagen and 50 µg.mL<sup>-1</sup> human fibronectin and infected the next day with *Nm* at an  
838 MOI of 100. After 30 min adhesion in the presence of 0, 13 or 26 µg.mL<sup>-1</sup> 20D9 antibody,  
839 unbound bacteria were washed three times with fresh cell culture medium and allowed to  
840 proliferate for 2h in the presence or not of the same concentrations of 20D9. Infected cells



841 were then fixed with 4% PFA and processed for immunofluorescence as for 3D SIM except  
842 that the 20D9 staining was omitted in wells where the antibody was already present. Ezrin was  
843 detected with a rabbit polyclonal anti-ezrin antibody (kind gift of Paul Mangeat). Images were  
844 taken with the Nikon Ti Eclipse spinning disk through a 100X oil immersion objective and  
845 ezrin recruitment was detected manually.

846

### 847 **3D Structured Illumination Microscopy (3D-SIM)**

848  $1,5 \cdot 10^5$  PM-EGFP expressing cells were seeded onto 12 mm glass coverslips coated with 3  
849  $\mu\text{g} \cdot \text{mL}^{-1}$  rat tail type I collagen and  $50 \mu\text{g} \cdot \text{mL}^{-1}$  human fibronectin and cultivated without  
850 ECGS. The next day, cells were infected for 30 min at a MOI of 200 with Endo-SFM-FBS  
851 grown bacteria and fixed by addition of one volume of pre-warmed 8% PFA in PBS and  
852 incubation at room temperature for 30 min. Cells were rinsed three times in PBS,  
853 permeabilized for 10 min with PBS-0.1% Triton-X100 and blocked for 30 min in PBS-0.2%  
854 gelatin (PBSG). Cells were then incubated for 1h with  $2 \mu\text{g} \cdot \text{mL}^{-1}$  rabbit polyclonal anti-GFP  
855 antibody to amplify the membrane GFP signal (A11122, Invitrogen) and  $1,2 \mu\text{g} \cdot \text{mL}^{-1}$  mouse  
856 monoclonal anti-PilE antibody 20D9 (Pujol et al., 1997) to detect type IV pili. Cells were  
857 incubated with  $10 \mu\text{g} \cdot \text{mL}^{-1}$  secondary goat anti-rabbit and goat anti-mouse polyclonal  
858 antibodies coupled to AlexaFluor-488 and -568 (Invitrogen) for 1h. DNA was detected with  
859  $0,5 \mu\text{g} \cdot \text{mL}^{-1}$  DAPI. All antibodies and DAPI were diluted in PBSG. Coverslips were mounted  
860 in Vectashield mounting medium (Vector Laboratories) and sealed with clear nail polish. SIM  
861 was performed on the ELYRA system controlled by the Zen software (Carl Zeiss) equipped  
862 with diode lasers at 405 nm, 488 nm and 561 nm. Images were acquired with an oil  
863 immersion 100x Plan-Apochromat M27 objective with a 1.46 numerical aperture and an  
864 additional 1.6x lens. Nominal pixel size was 0.049 and 0.084  $\mu\text{m}$  in the XY and XZ planes,  
865 respectively, using a 1x1 binning. Structured illumination grid pattern was shifted by five

866 different phases and three different angles along the whole Z-stack. Super resolved images  
867 were computationally reconstructed and channels were aligned with 100 nm TetraSpeck  
868 beads (Invitrogen) mounted in Vectashield. To further avoid reconstruction artefacts, raw  
869 images were checked for bleaching using the SIMcheck plugin<sup>63</sup> in Fiji<sup>64</sup>. Only data sets with  
870 total intensity variations below 20% over the whole Z-stack were used. We could detect  
871 however the presence of putative "hammerstroke" artifacts difficult to avoid in SIM<sup>65</sup>.  
872 Contrast was linearly enhanced in Fiji for clarity.

873

874 **Mathematical description of membrane spreading ("2D" membrane wetting) and**  
875 **membrane nanotube growth ("1D" membrane wetting) along adhesive fibers**

876 The free energy of the membrane spreading on a cylindrical fiber is the sum of three  
877 contributions: curvature energy, surface energy and gain of the binding energy between the  
878 adhesion molecules on the membrane and binders on the fiber,

879 
$$F_{2D} = \frac{\pi\kappa_b L}{r} + 2\pi r\sigma L + 2\pi r(-W)L$$

880 where  $r$  is the radius of the actin fiber,  $\kappa_b$  is the bending modulus,  $\sigma$  is the membrane tension  
881 of the GUV,  $L$  is the spreading length of the membrane along the fiber, and  $W$  is the adhesion  
882 energy per unit area described as

883 
$$W = \Gamma \cdot U.$$

884 In this equation,  $\Gamma$  is the number of binders per unit area on the fiber and  $U$  is the adhesion  
885 energy per pair of adhesion molecule-binder.

886 From the free energy, we derived the driving force of membrane spreading,  $f_d = -\frac{dF_{2D}}{dL}$ ;

887 
$$f_d = 2\pi r(W - \frac{\kappa_b}{2r^2} - \sigma)$$

888 For membrane spreading to occur,  $f_d$  has to be positive, leading to a minimum radius for an  
889 adhesive fiber

890 
$$r_{min} = \sqrt{\frac{\kappa_b}{2(W-\sigma)}}.$$

891 On a fiber of radius  $r > r_{min}$ , the floppy vesicle spreads. As  $L$  increases, the tension of the  
 892 vesicle increases because the excess membrane area decreases. Thus, the driving force  $f_d$   
 893 decreases and the spreading stops when  $f_d = 0$  ( $\sigma = \sigma_M = W - \frac{\kappa_b}{2r^2}$ ).

894 For an adhesive fiber of radius  $r < r_{min}$ , the vesicle cannot wrap around it. Instead, a  
 895 membrane tube grows along the fiber. The free energy of a tubular membrane having a radius  
 896  $R_t$  growing along the adhesive fiber with a length  $L_t$  is the sum of the tube energy  $F_t$  and the  
 897 gain of the adhesion energy  $W_t L_t$

898 
$$F_{1D} = F_t - W_t L_t.$$

899 The tube energy is the sum of the curvature energy and the surface energy,

900 
$$F_t = \frac{\pi \kappa_b L_t}{R_t} + 2\pi R_t \sigma L_t$$

901 and  $W_t$  is the adhesion energy of an adhesion molecule-binder pair per unit length, given by

902 
$$W_t = \Gamma_l \cdot U$$

903 where  $\Gamma_l$  is the number of bonds per unit length.  $F_{1D}$  depends upon two independent variables,

904  $L_t$  and the volume  $\Omega = \pi R_t^2 L_t$ . The force is coupled to  $L_t$ , and the pressure inside the tube to

905  $\Omega^{66}$ . The force is classically derived from the total energy  $F_{1D}$  with respect to  $L_t$  at constant

906 volume,  $\Omega = \pi R_t^2 L_t$ , and is given by  $f_L = - \left. \frac{dF_{1D}}{dL} \right]_{\Omega}$ . It leads to

907 
$$f_L = - \frac{3\pi \kappa_B}{2 R_t} - \pi \sigma R_t + W_t$$

908 and the pressure inside the tube  $p_t$  by the derivative of the free energy with respect to  $\Omega$  at

909 constant length; moreover,  $p_t$  calculated from  $F_t$  has to be equal to the pressure inside the

910 vesicle, which is approximated to zero<sup>29</sup>. It leads to

911 
$$p_t = \frac{\sigma}{R_t} - \frac{1}{2} \frac{\kappa_b}{R_t^3} \cong 0$$

912 These two equations lead to

913 
$$f_L = -2\pi\sqrt{2\kappa_b\sigma} + W_t$$

914 The first term is the retraction force acting on the tube<sup>26,29,67</sup> and the second term is the driving  
915 force pulling the tube.

916

### 917 **Numerical evaluation of $r_{min}$ in the case of GUVs spreading on biotinylated actin fibers**

918 Given that the size of a NeutrAvidin molecule is 5 nm<sup>68</sup>, which is comparable to the diameter  
919 of an actin molecule, 4-7 nm<sup>69</sup>, and the molar ratio of biotinylated actin:actin is 1:10,  $\Gamma \approx$

920  $\frac{1}{10} \times \frac{1}{5^2 \times 10^{-18}} = 4 \times 10^{15} \text{ m}^{-2}$ . Taking  $U = 25 k_B T^{68,70}$ ,  $W \approx 10^{17} k_B T \cdot \text{m}^{-2} = 4 \times 10^{-4} \text{ J} \cdot$

921  $\text{m}^{-2}$ . Here, for a floppy vesicle, taking  $\sigma \sim 10^{-6} \text{ J} \cdot \text{m}^{-2}$ ,  $W = 4 \times 10^{-4} \text{ J} \cdot \text{m}^{-2}$  and  $\kappa_b =$

922  $10 k_B T^{\eta_1}$ , we obtained  $r_{min} \approx 7 \text{ nm}$ . Assuming a cylindrical actin bundle composed of

923 cylindrical actin filaments, we estimated that there should be at least 4 – 10 actin filaments in  
924 the actin bundle for membrane spreading to occur by "2D" wetting.

925 For a biotinylated actin fiber of radius  $r < r_{min}$ , given the molar ratio of biotinylated

926 actin:actin to be 1:10 and taking into account the helical structure of actin filaments, we

927 estimate  $\Gamma_l \approx \frac{1}{10} \times 2 \times \frac{1}{5 \times 10^{-9}} = 4 \times 10^7 \text{ m}^{-1}$ . Taking  $U = 25 k_B T^{68,70}$ ,  $W_t \approx 10^9 k_B T \cdot$

928  $\text{m}^{-1} = 4 \text{ pN}$ . Taking value  $W_t \approx 4 \text{ pN}$ ,  $\kappa_b = 10 k_B T^{\eta_1}$ , we find that  $f_L > 0$  if  $\sigma < \sigma_M^t =$

929  $\frac{W_t^2}{8\pi^2\kappa_b} \sim 4 \times 10^{-6} \text{ N} \cdot \text{m}^{-1}$ .

930

### 931 **Dynamics of the two regimes**

932 *2D wetting*. The dynamic of membrane spreading on the actin fiber with a radius  $r$  is

933 characterized by  $\dot{L} = \frac{dL}{dt}$  which can be derived from the balance between the driving force  $f_d$

934 and the friction force  $f_s$ .

935 
$$f_s = 2\pi r \dot{L}(\eta + kL)$$

936 where  $\eta$  is a lipid viscosity and  $k = \frac{\eta_0}{a}$  is friction coefficient,  $\eta_0$  is a molecular viscosity and  
937  $a$  is a molecular length<sup>23</sup>. The friction force  $f_s$  is the sum of friction due to the defect at the  
938 contact line between the vesicle and the spreading film, and the friction between the spreading  
939 membrane and the surface of the fiber. If the first term is dominant, the balance of the driving  
940 and friction forces leads to  $\dot{L} = \frac{f_d}{2\pi r\eta}$ . If the second term is dominant, the growth is diffusive  
941 at short time and  $L^2 = \frac{f_d \cdot t}{2\pi r k}$ .

942 *1D wetting*. For membrane nanotube growing along the actin fiber,  $\dot{L}_t$  is determined by the  
943 balance between the driving force  $f_L$  and the friction force  $f_v$  introduced by E. Evans<sup>26</sup>

944 
$$f_v = 2\pi\tilde{\eta}\dot{L}_t \ln\left(\frac{R_v}{R_t}\right)$$

945 where  $\tilde{\eta}$  is a membrane viscosity,  $R_v$  is the radius of the vesicle from where the membrane  
946 nanotube with a radius of  $R_t$  grows. The origin of this force is due to the slip between the two  
947 monolayers at the entry of the tube: due to the cylindrical geometry, the flux of the lipids in  
948 the outer leaflet of the tube is larger than that in the inner one<sup>26</sup>. For short tubes, assuming  $\sigma$  is  
949 small, the balance of the driving force and the friction force leads to

950 
$$\dot{L}_t = \frac{W_t}{2\pi\tilde{\eta} \ln\left(\frac{R_v}{R_t}\right)}$$

951  
952 From this equation, taking from Figure 1f,  $\dot{L}_t \approx 1 - 0.25 \mu\text{m}/\text{sec}$ ,  $W_t = 10 \text{ pN}$  and  $\ln\left(\frac{R_v}{R_t}\right) \approx$   
953  $7$ , we obtained for the membrane surface viscosity  $\tilde{\eta}$  ranging between  $2 \times 10^{-7}$  and  
954  $10^{-6} \text{ N}\cdot\text{sec}\cdot\text{m}^{-1}$  (Surface Poiseuille, SP), which are of the same order as the surface  
955 viscosities measured by R.E. Waugh for vesicles<sup>72</sup>.

956

957

958

959 **Interaction of giant unilamellar vesicles (GUVs) with adhesive nanofibers**

960 *Reagents.* 1,2-dioleoyl-sn-glycero-3-phosphocholine (DOPC, 850375) and 1,2-distearoyl-sn-  
961 glycero-3-phosphoethanolamine-N [biotinyl(polyethyleneglycol)-2000] (DSPE-PEG(2000)-  
962 biotin, 880129P) were purchased from Avanti Polar Lipids. BODIPY-TR-C5-ceramide,  
963 (BODIPY TR ceramide, D7540) was purchased from Invitrogen. Hellmanex®II was  
964 purchased from Hellma (9-307-010-3-507). Culture-Inserts 2 Well for self-insertion were  
965 purchased from ibidi (Silicon open chambers, 80209). Biotinylated actin was purchased from  
966 Cytoskeleton (biotin-actin, AB07). Phalloidin-FluoProbes®488 was purchased from  
967 Interchim (phalloidin488, FP-JO2830).  $\beta$ -casein from bovine milk (>98% pure, C6905),  
968 methylcellulose (M0512 4000 cPs) and other reagents were purchased from Sigma-Aldrich.

969

970 *Protein purification.* Muscle actin was purified from rabbit muscle and isolated in monomeric  
971 form in G-buffer (5 mM Tris-Cl<sup>-</sup>, pH 7.8, 0.1 mM CaCl<sub>2</sub>, 0.2 mM ATP, 1 mM DTT, 0.01%  
972 NaN<sub>3</sub>) as previously described<sup>73</sup>. Recombinant mouse IRSp53 I-BAR domain was purified as  
973 previously described<sup>74</sup>.

974

975 *GUV wetting on actin fibers.* All the steps were performed at room temperature. GUVs  
976 composed of DOPC supplemented with 0.5 mole% BODIPY TR ceramide and 0.5-1mole%  
977 DSPE-PEG(2000)-biotin were prepared by using polyvinyl alcohol (PVA) gel-assisted  
978 method in a sucrose buffer (200 mM) as described previously<sup>75</sup>. Muscle filamentous actin (F-  
979 actin) was pre-polymerized in an actin polymerization buffer (F-buffer, 5 mM Tris-Cl<sup>-</sup>, pH  
980 7.8, 100 mM KCl, 0.2 mM EGTA, 1 mM MgCl<sub>2</sub>, 0.2 mM ATP, 10 mM DTT, 1 mM  
981 DABCO, 0.01% NaN<sub>3</sub>) in the presence of biotin-actin at a biotin-actin:actin molar ratio of  
982 1:10, for at least 1hr. To visualize actin, F-actin was labeled with an equal molar amount of  
983 phalloidin488. Glass coverslips were bath sonicated with 2% Hellmanex for at least 30 min,

984 rinsed with MilliQ water, sonicated with 1M KOH, and finally sonicated with MilliQ water  
985 for 20 min. Experimental chambers were assembled by placing a silicon open chamber on the  
986 cleaned coverslip. The glass substrate of the chamber was incubated with IRSp53 I-BAR  
987 domain proteins for at least 5 min, rinsed with F-buffer, incubated with  $\beta$ -casein ( $5 \text{ mg}\cdot\text{mL}^{-1}$ )  
988 for at least 5 min, rinsed with F-buffer, incubated with F-actin at a concentration of  $3 \text{ }\mu\text{M}$  and  
989 in the presence of 0.3% methylcellulose for at least 15 min, rinsed with F-buffer, and finally  
990 incubated with NeutrAvidin ( $1 \text{ }\mu\text{M}$ ) for at least 10 min followed by rinsing with F-buffer.  
991 GUVs suspension in F-buffer were added into the chamber and incubated for at least 30 min  
992 before observation. To favour actin bundle formation, F-buffer was supplemented with  
993 around  $20 \text{ mM}$   $\text{MgCl}_2$  when adding F-actin into the chamber. Samples were observed with an  
994 inverted spinning disk confocal microscope (Nikon eclipse Ti-E equipped with a 100X oil  
995 immersion objective and a CMOS camera, Prime 95B, Photometrics).

996

### 997 **Cryo-electron microscopy on vesicles with adhesive nanofibers**

998 All steps were performed at room temperature. Vesicles were prepared by drying  $0.3 \text{ mg}$  of  
999 lipids dissolving in chloroform (DOPC/  $0.5 \text{ mole}\%$  DSPE-PEG(2000)-biotin) under nitrogen  
1000 gas and then vacuum for at least 1 hr, followed by adding  $300 \text{ }\mu\text{L}$  of vesicle buffer ( $60 \text{ mM}$   
1001 NaCl and  $20 \text{ mM}$  Tris pH 7.5) for resuspension, and finally a vortex mixing for 10 sec.  
1002 A  $1.5 \text{ }\mu\text{M}$  of F-actin containing  $10 \text{ mole}\%$  biotin-actin in F-buffer was incubated with  $\text{MgCl}_2$   
1003 at a final concentration of  $20 \text{ mM}$  for 20 min to favor bundle formation, followed by  
1004 incubating with NeutrAvidin at  $0.7 \text{ }\mu\text{M}$  for 5 min.  $20 \text{ }\mu\text{L}$  of vesicles were incubated with  $20$   
1005  $\mu\text{L}$  of the pre-bundled F-actin for at least 1 hr before vitrification. The samples were vitrified  
1006 on copper holey lacey grids (Ted Pella) using an automated device (EMGP, Leica) by blotting  
1007 the excess sample on the opposite side from the droplet of sample for 4 seconds in a humid  
1008 environment ( $90 \%$  humidity). Imaging was performed on a LaB6 microscope operated at  $200$

1009 kV (Technai G2, FEI) and equipped with a 4KX 4K CMOS camera (F416, TVIPS).  
1010 Automated data collection for 2D imaging were carried out with the EMTools software suite.

1011

### 1012 **Cell culture on anodized aluminum oxide (AAO) membranes (or Anodiscs)**

1013 13 mm Whatman Anodiscs with 100 nm pores (GE Healthcare) were coated for 30 min with  
1014  $0,1 \mu\text{g.mL}^{-1}$  APP3 in 10 mM HEPES pH 7.4, rinsed three times in 0,1M HEPES and once  
1015 with distilled water, and then coated for 30 min with  $100 \mu\text{M}$  BCN-RGD in PBS and rinsed  
1016 three times in PBS <sup>33</sup>.  $1,5.10^5$  HUVEC were seeded per disc and cultivated overnight. The  
1017 next day, cell culture medium was renewed with or without 100 nm cytochalasin D for 20 min  
1018 at  $37^\circ\text{C}$  and cells were fixed in 2.5% glutaraldehyde (final concentration). Cells were then  
1019 processed as for SEM.

1020

### 1021 **Preparation of native basal membranes from mouse mesentery**

1022 All experiments were conducted in accordance with the European Directive 2010/63/EU  
1023 and national regulation for the protection of vertebrate animals used for experimental  
1024 purposes (Decree 2013-118). Mice were kept in the Specific Pathogen Free (SPF) animal  
1025 house of Institut Curie for breeding. Mesentery was isolated from a two-months old female  
1026 C57BL/6 mouse according to previously described protocol<sup>76,77</sup>. Prior to mesentery isolation,  
1027 the polyester membrane of a 6.4 mm diameter transwell insert (Corning) was removed using a  
1028 scalpel. While holding the mouse intestine with tweezers, the mesentery was stretched and  
1029 glued on the insert using surgical glue (3M Vetbond). Mesentery was washed with cold PBS  
1030 supplemented with 1% Antibiotic-Antimycotic (Life Technologies), and incubated with 1M  
1031 ammonium hydroxide ( $\text{NH}_4\text{OH}$ , Sigma-Aldrich) for 40 min at RT to remove all cells present  
1032 in the mesentery. Mesentery was washed three times with PBS supplemented with 1%



1033 Antibiotic-Antimycotic and stored at 4°C prior to seeding with HUVEC cells. Basal  
1034 membrane with and without endothelial cells were processed for SEM as described above.

1035

### 1036 **Estimation of the binding energy for *Pseudomonas aeruginosa* T4P**

1037 We found an AFM study in which rupturing of type IV pili from *Pseudomonas aeruginosa*  
1038 was performed<sup>78</sup>. In this article, there are two experiments where the rupture force was  
1039 measured at two given velocities (see Figure 5 of the paper). Assuming a single barrier in the  
1040 energy landscape, we extracted the binding energy  $U$  by using the following equation<sup>79</sup>

$$1041 \quad f \cdot a = U + kT \ln\left(\frac{V}{V_0}\right)$$

1042 where  $f$  is the rupture force,  $a$  is the molecular length,  $U$  is the adhesion energy,  $V$  is the  
1043 loading velocity and  $V_0$  is a typical thermal velocity (in the order of 10 m.s<sup>-1</sup>). From the  
1044 experimental data  $f = 250$  pN for  $V = 1$  μm.s<sup>-1</sup> and  $f = 500$  pN for  $V = 10$  μm.s<sup>-1</sup>, we  
1045 found  $U \sim 18 k_B T$ , which is consistent with the claiming of P.-G. de Gennes that for most  
1046 practical separation experiments  $U \sim 15 k_B T$ <sup>79</sup>.

1047

### 1048 **Statistical analysis**

1049 Data were analyzed in the Prism software (GraphPad). For comparison of exact values  
1050 measured in multiple individual bacteria over several independent experiments, the data sets  
1051 were first tested for normality with a D'Agostino & Pearson test and then tested for statistical  
1052 difference accordingly, either by an unpaired Mann-Whitney test (no normality) or an  
1053 unpaired  $t$  test (normality). For comparison of mean values pooled over several independent  
1054 experiments, statistical difference was tested with a paired  $t$  test. \*, P<0.05; \*\*, P<0.01.

1055

### 1056 **Data availability**

1057 The data that support the findings of this study are available from the corresponding author  
1058 upon reasonable request

1059

1060 **Supplementary references**

1061 62 Azioune, A., Storch, M., Bornens, M., They, M. & Piel, M. Simple and rapid process  
1062 for single cell micro-patterning. *Lab Chip* **9**, 1640-1642, doi:10.1039/b821581m (2009).

1063 63 Ball, G. *et al.* SIMcheck: a Toolbox for Successful Super-resolution Structured  
1064 Illumination Microscopy. *Sci Rep-Uk* **5**, doi:ARTN 15915

1065 10.1038/srep15915 (2015).

1066 64 Schindelin, J. *et al.* Fiji: an open-source platform for biological-image analysis. *Nat*  
1067 *Methods* **9**, 676-682, doi:10.1038/nmeth.2019 (2012).

1068 65 Demmerle, J. *et al.* Strategic and practical guidelines for successful structured  
1069 illumination microscopy. *Nat Protoc* **12**, 988-1010, doi:10.1038/nprot.2017.019 (2017).

1070 66 Helfrich, W. Elastic properties of lipid bilayers: theory and possible experiments. *Z*  
1071 *Naturforsch C* **28**, 693-703 (1973).

1072 67 Powers, T. R., Huber, G. & Goldstein, R. E. Fluid-membrane tethers: Minimal surfaces  
1073 and elastic boundary layers. *Phys. Rev. E*, 041901 (2002).

1074 68 Noppl-Simson, D. A. & Needham, D. Avidin-biotin interactions at vesicle surfaces:  
1075 adsorption and binding, cross-bridge formation, and lateral interactions. *Biophys J* **70**, 1391-

1076 1401 (1996).

1077 69 von der Ecken, J. *et al.* Structure of the F-actin-tropomyosin complex. *Nature* **519**, 114  
1078 (2015).

1079 70 Merkel, R., Nassoy, P., Leung, A., Ritchie, K. & Evans, E. Energy landscapes of  
1080 receptor-ligand bonds explored with dynamic force spectroscopy. *Nature* **397**, 50 (1999).

- 1081 71 Rawicz, W., Olbrich, K., McIntosh, T., Needham, D. & Evans, E. Effect of chain length  
1082 and unsaturation on elasticity of lipid bilayers. *Biophys J* **79**, 328-339 (2000).
- 1083 72 Waugh, R. E. Surface viscosity measurements from large bilayer vesicle tether  
1084 formation. II. Experiments. *Biophys J* **38**, 29-37, doi:10.1016/S0006-3495(82)84527-X (1982).
- 1085 73 Spudich, J. A. & Watt, S. The regulation of rabbit skeletal muscle contraction I.  
1086 Biochemical studies of the interaction of the tropomyosin-troponin complex with actin and the  
1087 proteolytic fragments of myosin. *J Biol Chem* **246**, 4866-4871 (1971).
- 1088 74 Saarikangas, J. *et al.* Molecular mechanisms of membrane deformation by I-BAR  
1089 domain proteins. *Curr Biol* **19**, 95-107 (2009).
- 1090 75 Weinberger, A. *et al.* Gel-assisted formation of giant unilamellar vesicles. *Biophys J*  
1091 **105**, 154-164 (2013).
- 1092 76 Glentis, A. *et al.* Cancer-associated fibroblasts induce metalloprotease-independent  
1093 cancer cell invasion of the basement membrane. *Nat Commun* **8**, 924, doi:10.1038/s41467-017-  
1094 00985-8 (2017).
- 1095 77 Schoumacher, M., Glentis, A., Gurchenkov, V. V. & Vignjevic, D. M. Basement  
1096 membrane invasion assays: native basement membrane and chemoinvasion assay. *Methods Mol*  
1097 *Biol* **1046**, 133-144, doi:10.1007/978-1-62703-538-5\_8 (2013).
- 1098 78 Beaussart, A. *et al.* Nanoscale Adhesion Forces of *Pseudomonas aeruginosa* Type IV  
1099 Pili. *Acs Nano* **8**, 10723-10733, doi:10.1021/nn5044383 (2014).
- 1100 79 Brochard-Wyart, F. & de Gennes, P. G. Adhesion induced by mobile binders:  
1101 Dynamics. *P Natl Acad Sci USA* **99**, 7854-7859, doi:10.1073/pnas.112221299 (2002).
- 1102

1103 **Supplementary information (movies S1 to S7)**

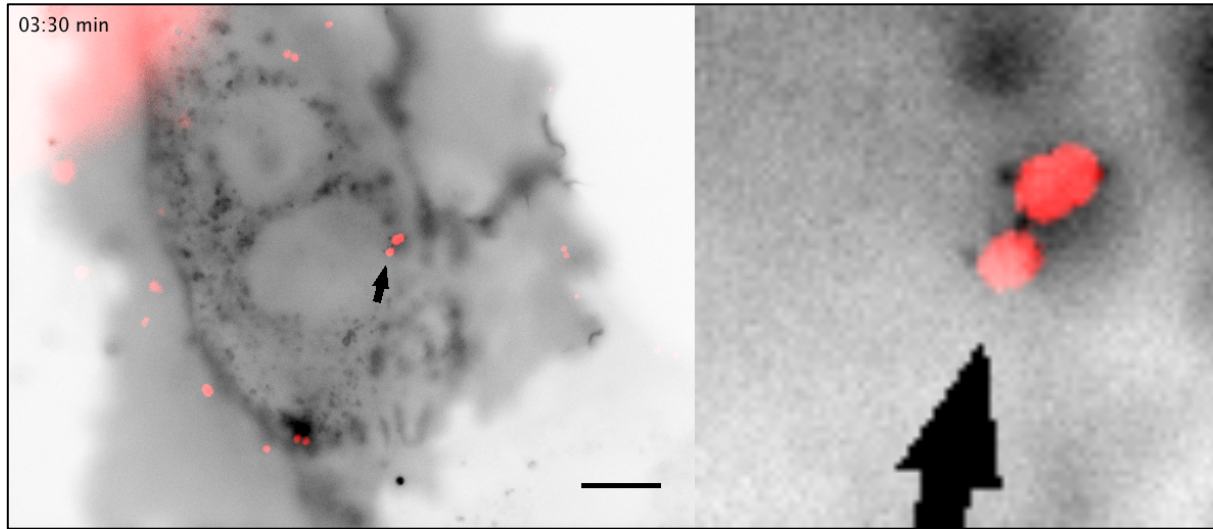

1104

1105 **Movie S1.** Oblique illumination live cell imaging of a HUVEC expressing the membrane  
1106 marker GFP-F (inverted contrast) infected by *Nm*-iRFP. A single focal plan is shown. Plasma  
1107 membrane protrusions from the host cell are visible as discrete bright dots surrounding the  
1108 bacterial bodies. Scale bar, 10  $\mu\text{m}$ . Representative of several events in  $n > 10$  independent  
1109 experiments.

1110

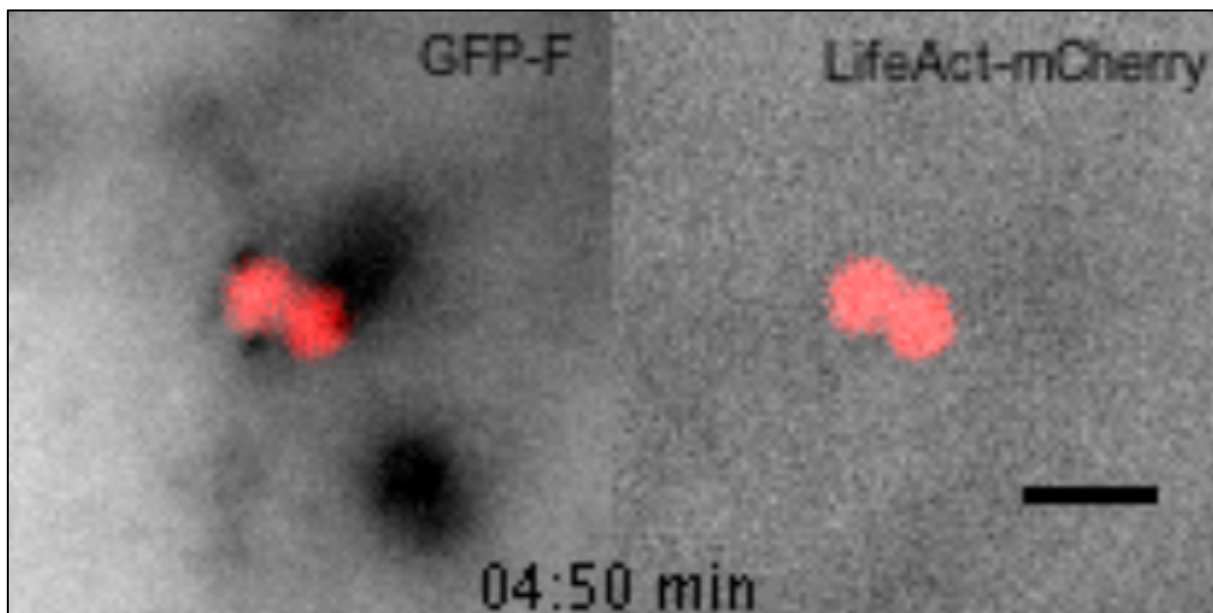

1111

1112 **Movie S2.** Oblique illumination live cell imaging of a HUVEC expressing the membrane  
1113 marker GFP-F and LifeAct-mCherry infected by *Nm*-iRFP. A single focal plan is shown.

1114 Plasma membrane protrusions from the host cell are visible as discrete bright dots  
1115 surrounding the bacterial bodies. No accumulation of LifeAct-mCherry is observed. Scale bar,  
1116 2  $\mu$ m. Representative of several events in n=2 independent experiments.

1117

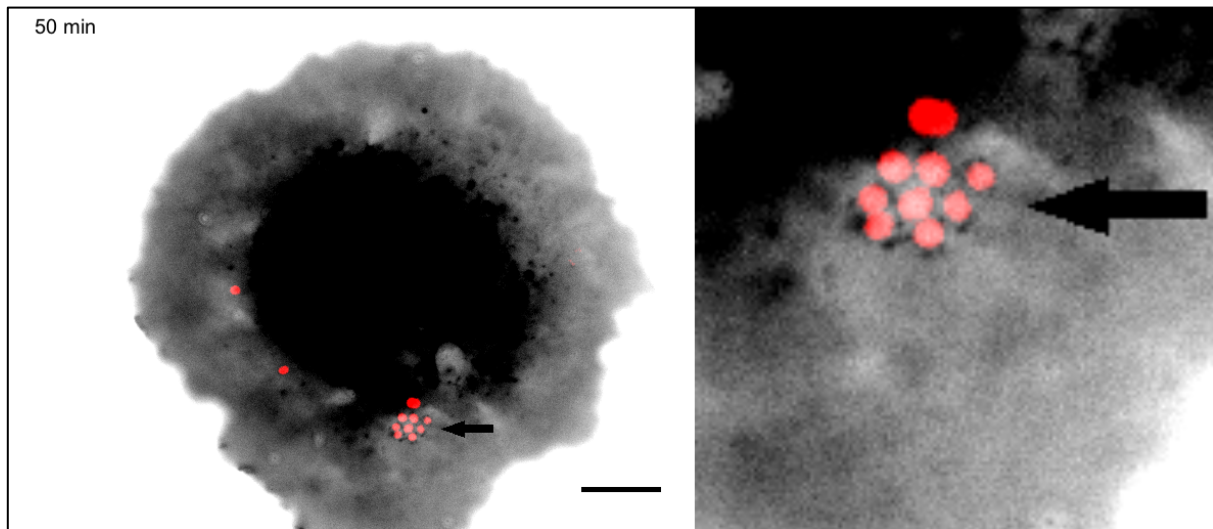

1118

1119 **Movie S3.** Oblique illumination live cell imaging of a micropatterned HUVEC expressing the  
1120 membrane marker PM-EGFP (inverted contrast) and infected by *Nm*-iRFP. A single focal  
1121 plane is shown. Plasma membrane protrusions can be followed over two bacterial divisions.  
1122 Scale bar, 10  $\mu$ m. Representative of n=2 independent experiments.

1123

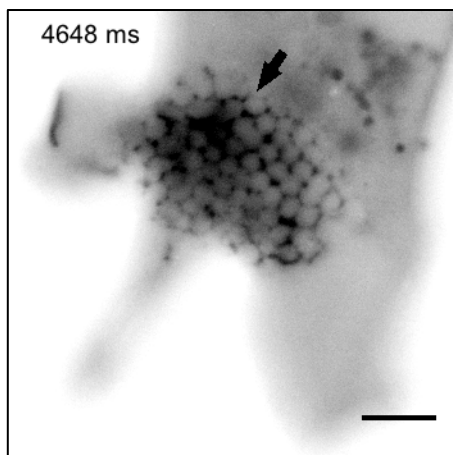

1124

1125 **Movie S4.** Oblique illumination live cell high speed imaging of a HUVEC expressing GFP-F  
1126 (inverted contrast) infected with a pre-formed bacterial aggregate of *Nm*-iRFP (not visible on

1127 the movie, please refer to Fig. 2). A single focal plan is shown. The plasma membrane  
1128 protrusions barely move over 10 seconds, except at the aggregate periphery. Scale bar, 5  $\mu$ m.  
1129 Representative of several events in n>10 independent experiments.

1130

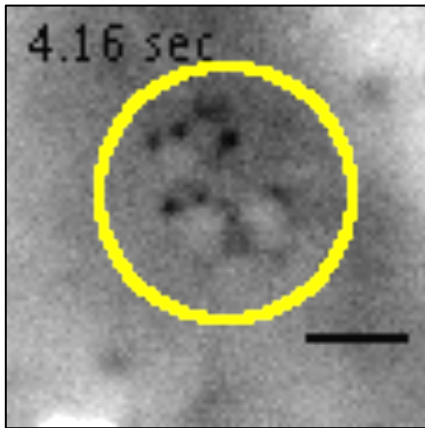

1131

1132 **Movie S5.** Oblique illumination live cell high speed imaging of a HUVEC expressing GFP-F  
1133 (inverted contrast) infected with wild-type *Nm*-iRFP bacteria. In this experimental setting,  
1134 only one channel can be recorded at high speed. The position of 3 bacteria, denoted by a  
1135 yellow ellipse, was assessed before recording of the GFP-F channel. Plasma membrane  
1136 protrusions from the host cell are visible as discrete bright dots. Scale bar, 2  $\mu$ m.

1137 Representative of several events in n=10 independent experiments.

1138

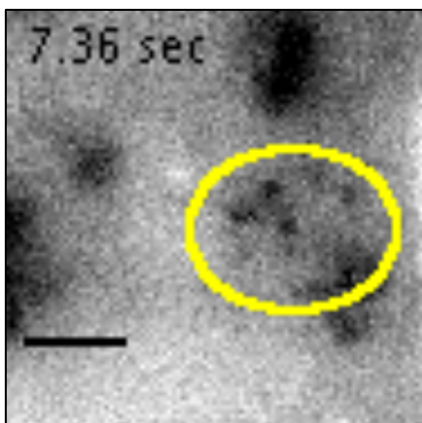

1139

1140 **Movie S6.** Oblique illumination live cell high speed imaging of a HUVEC expressing GFP-F  
1141 and treated for 20 min with 100nM cytochalasin D (inverted contrast) infected with *Nm*-iRFP



1142 bacteria. In this experimental setting, only one channel can be recorded at high speed. The  
1143 position of 2 bacteria, denoted by a yellow ellipse, was assessed before recording of the GFP-  
1144 F channel. Plasma membrane protrusions from the host cell are visible as discrete bright dots.  
1145 Scale bar, 2  $\mu\text{m}$ . Representative of several events in n=3 independent experiments.

1146

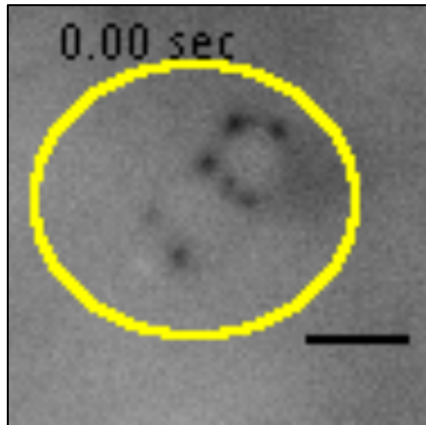

1147

1148 **Movie S7.** Oblique illumination live cell high speed imaging of a HUVEC expressing GFP-F  
1149 (inverted contrast) infected with *pilT*-iRFP bacteria which are deficient for T4P retraction. In  
1150 this experimental setting, only one channel can be recorded at high speed. The position of 2  
1151 bacteria, denoted by a yellow ellipse, was assessed before recording of the GFP-F channel.  
1152 Plasma membrane protrusions from the host cell are visible as discrete bright dots. Scale bar,  
1153 2  $\mu\text{m}$ . Representative of several events in n=3 independent experiments.

1154
